# Supplementary material
Source: Research Square preprint supplement (doi:10.21203/rs.3.rs-8968229/v1)
Supplement: Supplementary file 1 [file 7e2e9593f58e513cc79876e3.docx]

**Supplementary Figures**

**
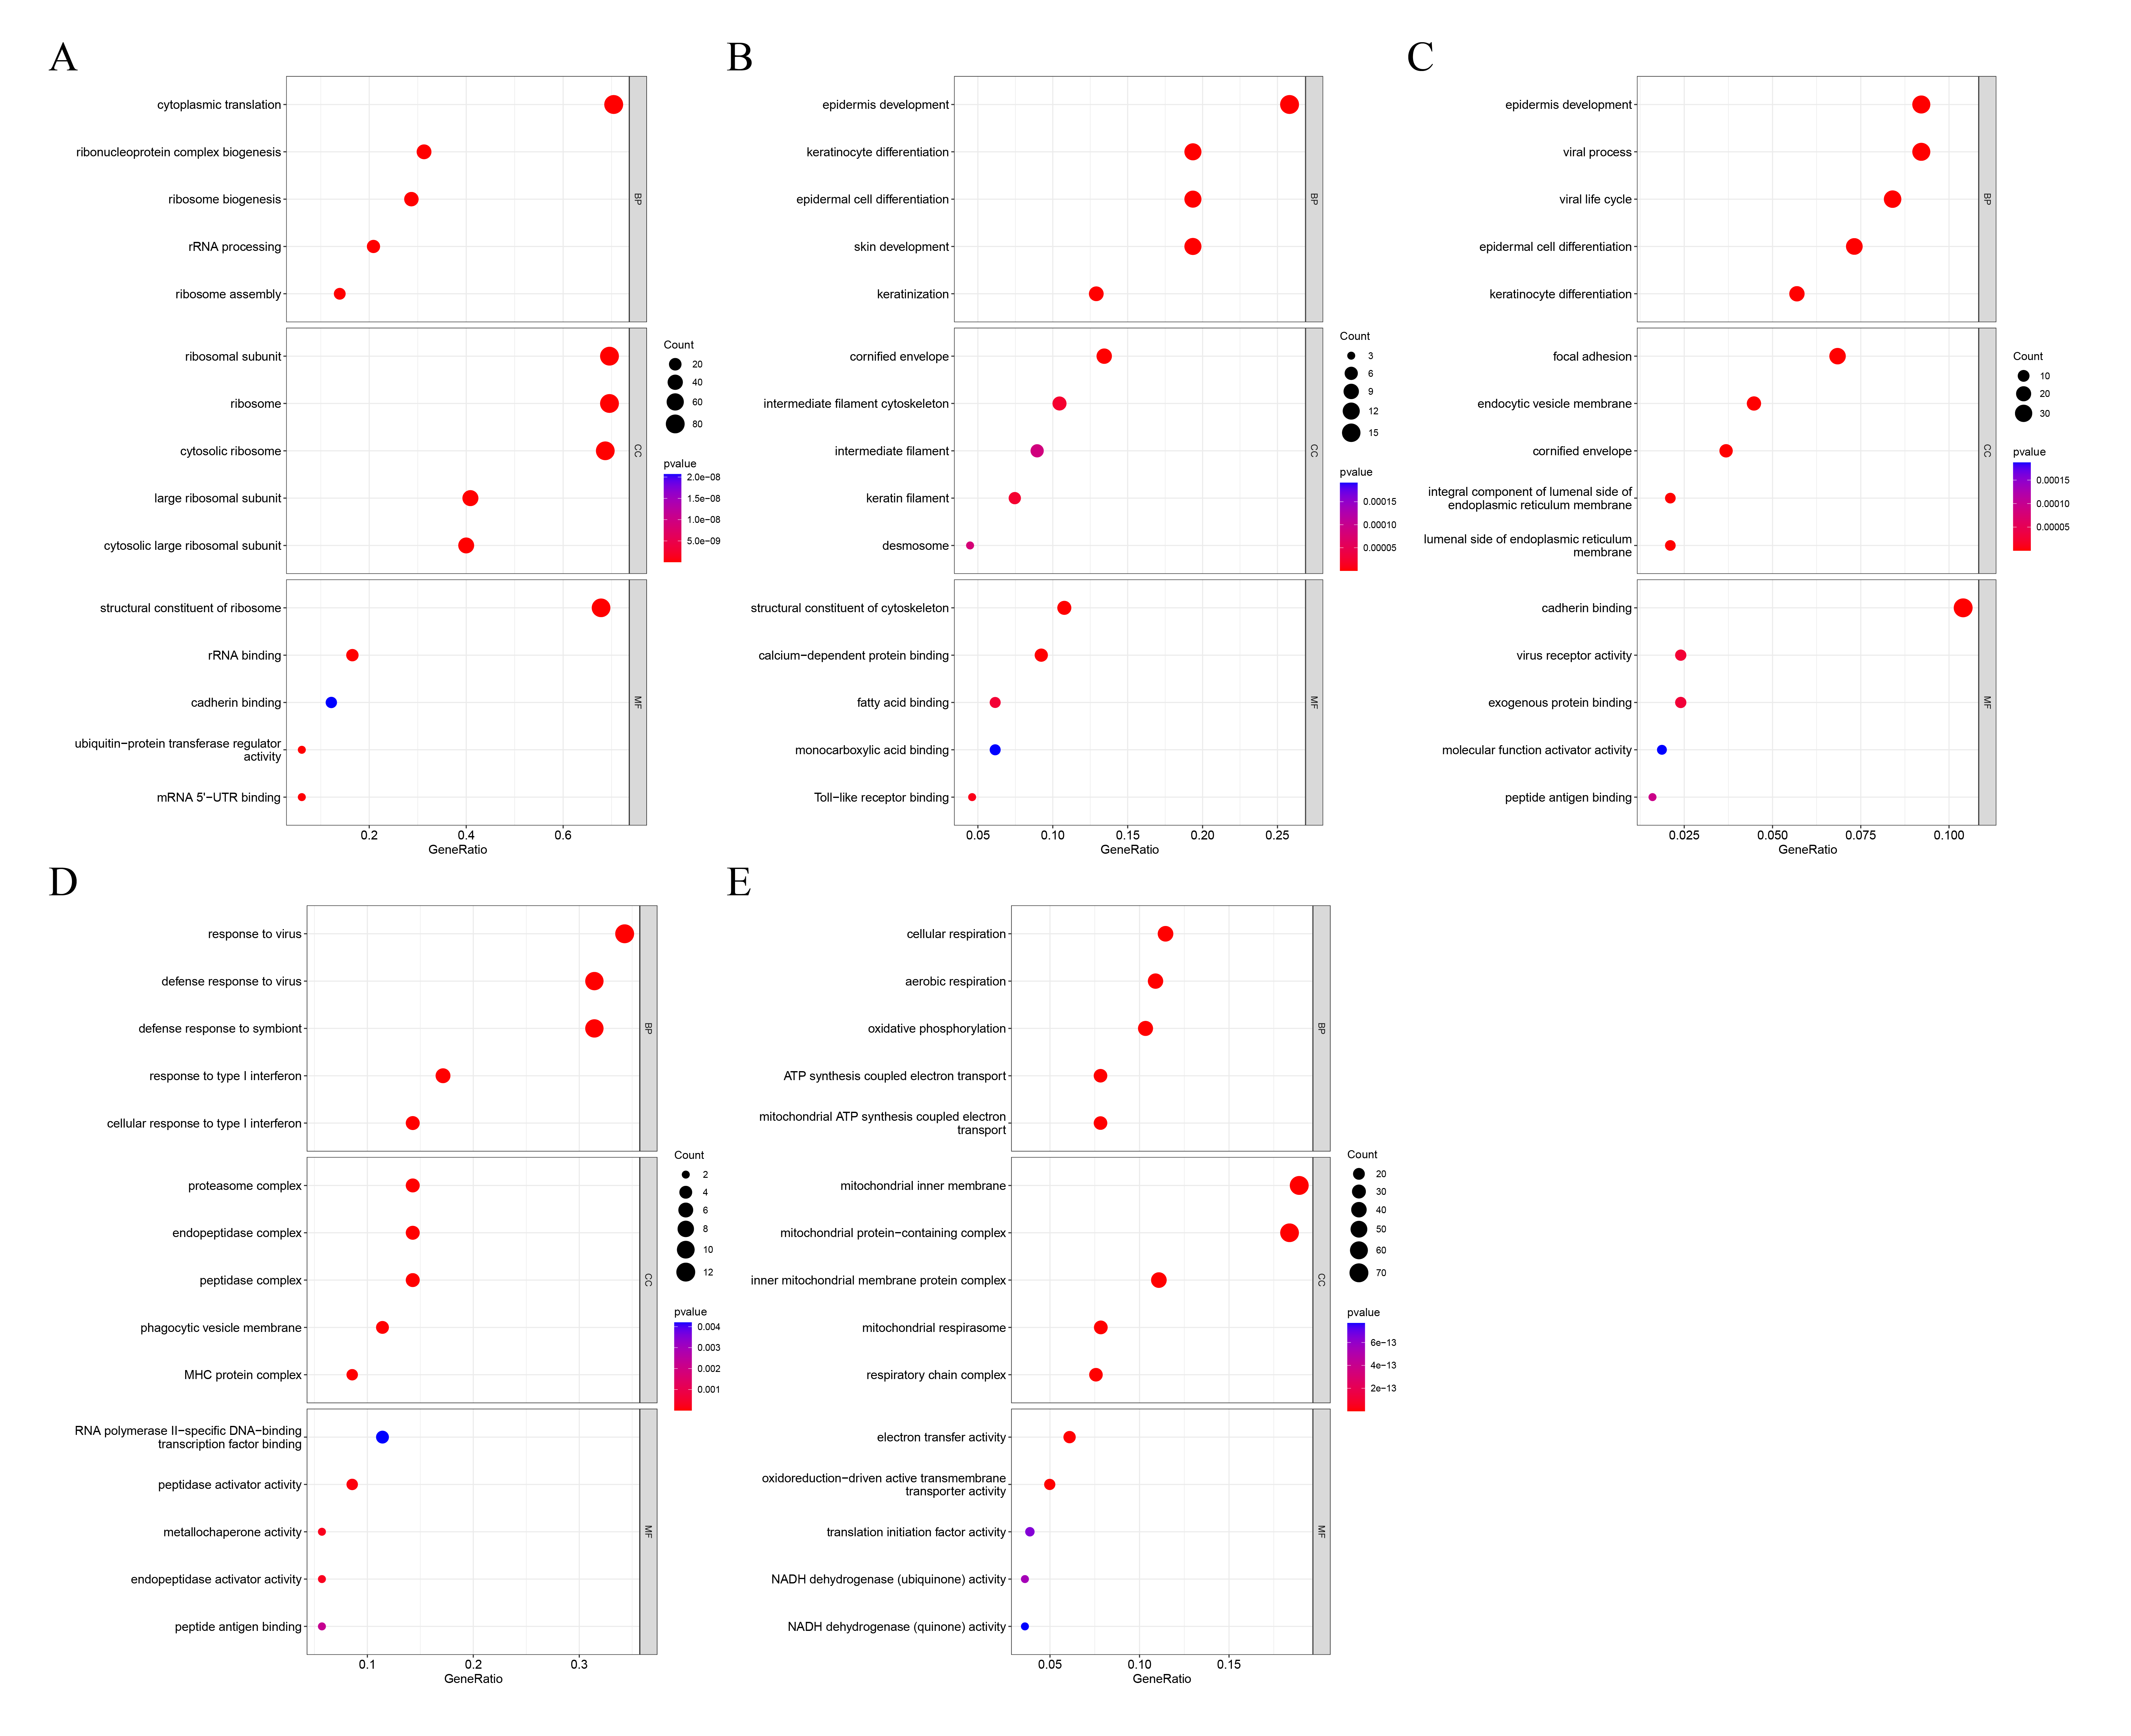
**

**Figure S1** Secondary clustering of neutrophils identified 4 distinct subpopulations. **(A-E)** The Gene Ontology (GO) termsenriched by differentially expressed genes (DEGs) between Cluster 0 **(A)/**Cluster 1 **(B)**/Cluster 2 **(C)**/Cluster 3 **(D)**/Cluster 4 **(E)** and other cell subpopulations.


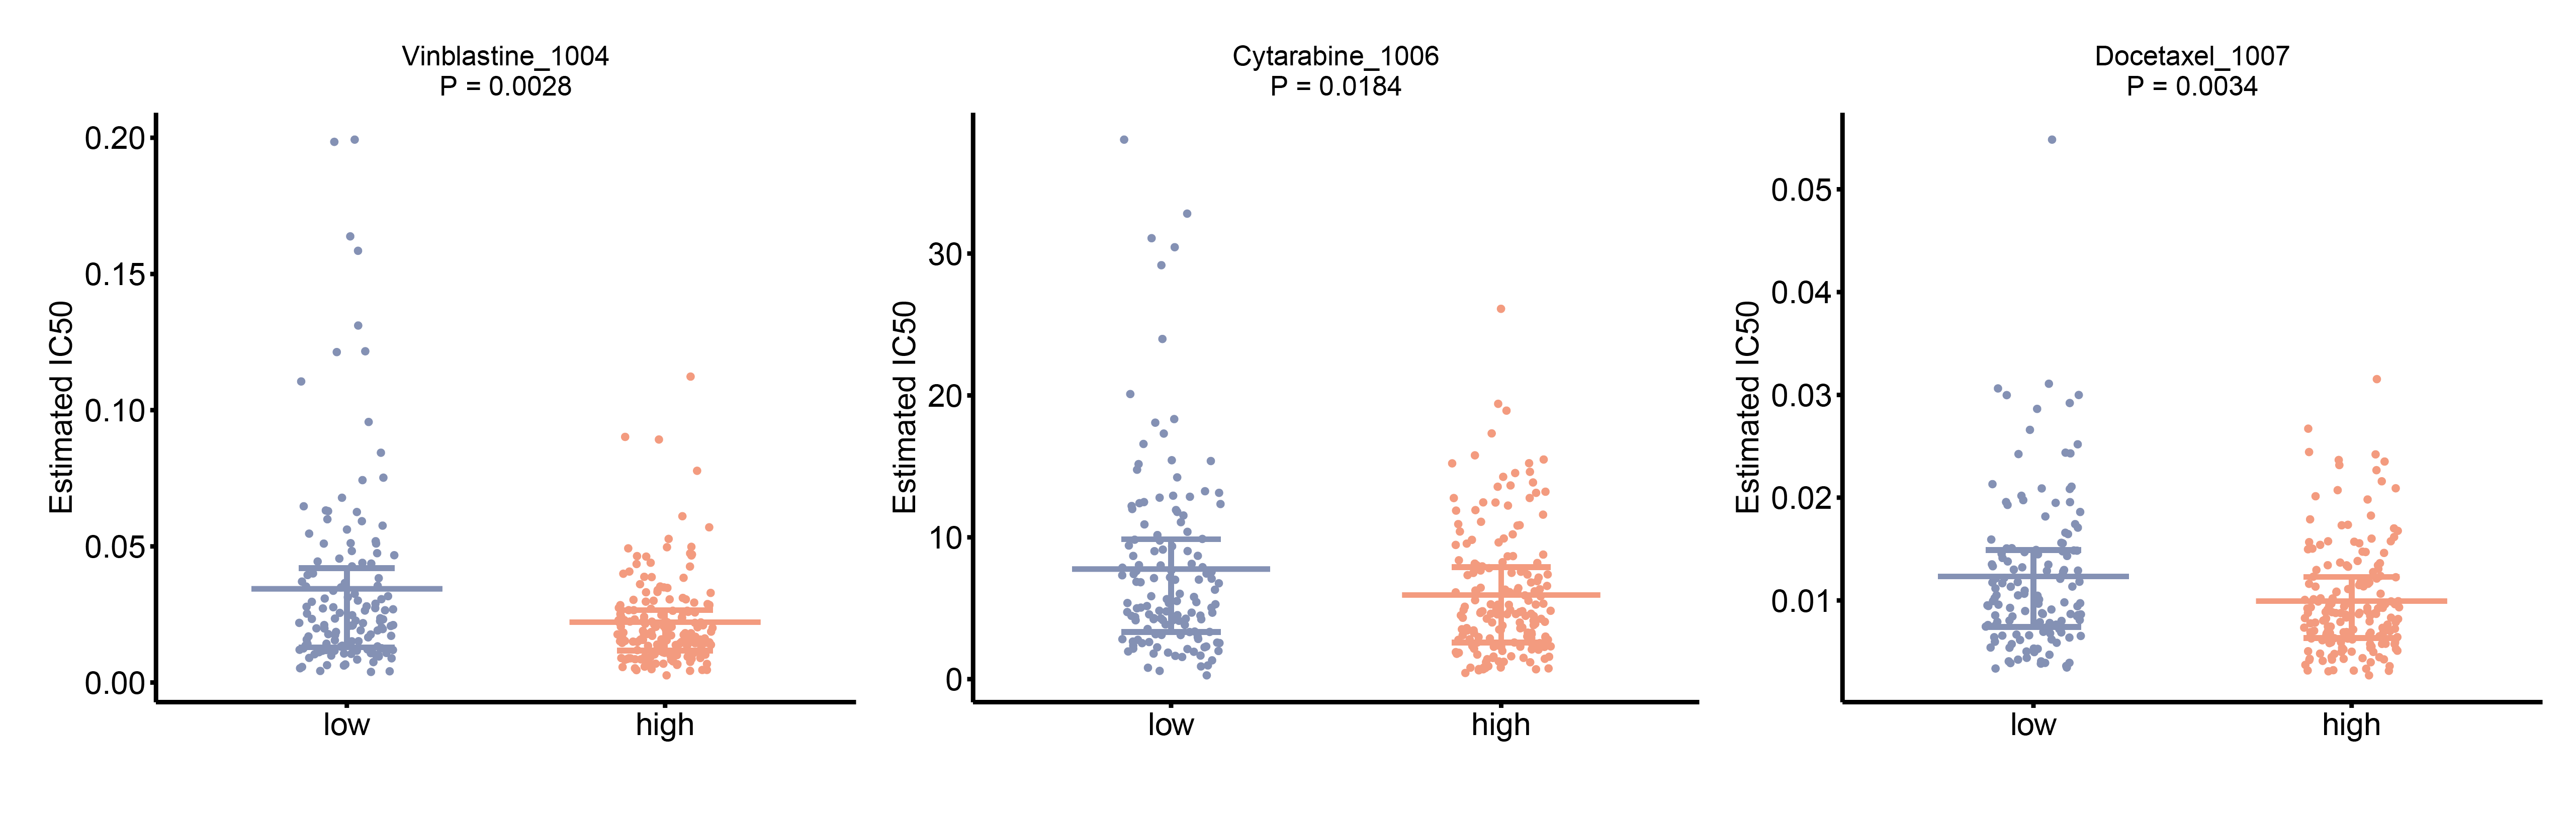


**Figure S2** Differences in half-maximal inhibitory concentration (IC50) of Vinblastine_1004, Cytarabine_1006, and Docetaxel_1007 between ATP6V1E1 high- and low- expression cohorts.
