# Supplementary material
Source: Research Square preprint supplement (doi:10.21203/rs.3.rs-8968229/v1)
Supplement: Supplementary file 1 [file 60d7ecf94e06f773d514ab96.xlsx]

## Sheet: Table11-3.IC50_ATP6V1E1_pvalue_
	pvalue	p
Vinblastine_1004	0.00280973297059521	0.0028
Cytarabine_1006	0.0184241930010661	0.0184
Docetaxel_1007	0.0034460433009529	0.0034
Nilotinib_1013	0.00289352988877714	0.0029
Axitinib_1021	0.000606901719492803	< 0.001
PD173074_1049	0.0163079719644566	0.0163
MK-2206_1053	0.0155232159072367	0.0155
Palbociclib_1054	0.0496990942922658	0.0497
Pictilisib_1058	0.00156390777245211	0.0016
AZD8055_1059	0.00757441993239087	0.0076
PD0325901_1060	0.00502574397656491	0.005
Obatoclax Mesylate_1068	0.0147194660858808	0.0147
Dasatinib_1079	0.005549795851579	0.0055
Paclitaxel_1080	4.76098139576538e-05	< 0.001
Rapamycin_1084	1.24822015293238e-05	< 0.001
GSK1904529A_1093	0.00581844671315992	0.0058
Tozasertib_1096	0.00162002343301355	0.0016
PF-4708671_1129	0.0403730450838939	0.0404
PRIMA-1MET_1131	0.00374151903543654	0.0037
Erlotinib_1168	0.00591056878215877	0.0059
MK-1775_1179	0.0336341520687059	0.0336
Dinaciclib_1180	0.0165965742312996	0.0166
Bortezomib_1191	0.0307413112950418	0.0307
Daporinad_1248	2.13401555478451e-06	< 0.001
BMS-345541_1249	0.0426843865085185	0.0427
Trametinib_1372	0.0474997384360973	0.0475
AZD1332_1463	0.039380361478573	0.0394
Pevonedistat_1529	0.0218629486924824	0.0219
Uprosertib_1553	0.0408772922205097	0.0409
Luminespib_1559	0.0243458758245865	0.0243
Alpelisib_1560	0.00581844671315992	0.0058
Taselisib_1561	0.00225336928558997	0.0023
Entinostat_1593	6.67189629884555e-06	< 0.001
OSI-027_1594	0.00986466178959019	0.0099
PFI3_1620	0.0247551291002802	0.0248
ML323_1629	0.033420063755618	0.0334
Entospletinib_1630	0.0446950617829144	0.0447
AZD5153_1706	0.0486623226249396	0.0487
CDK9_5038_1709	0.0351658634008638	0.0352
Eg5_9814_1712	0.00546276493383264	0.0055
ERK_2440_1713	5.70571628039034e-05	< 0.001
ERK_6604_1714	0.0173680288052598	0.0174
JAK1_8709_1718	0.0125240112562593	0.0125
PAK_5339_1730	0.0161937715317616	0.0162
ULK1_4989_1733	0.000966744028764759	< 0.001
Selumetinib_1736	1.33936396530326e-05	< 0.001
AZD4547_1786	0.00244375249032118	0.0024
Topotecan_1808	0.0132689479421129	0.0133
Docetaxel_1819	0.0170676708926623	0.0171
Gallibiscoquinazole_1830	0.00128599310597742	0.0013
BDP-00009066_1866	0.0314437269824113	0.0314
Buparlisib_1873	0.0313425465339124	0.0313
ABT737_1910	9.61784789194096e-05	< 0.001
Afuresertib_1912	0.0136069932281551	0.0136
AZD5363_1916	0.00607495031774176	0.0061
Cediranib_1922	0.0041939180963911	0.0042
Ipatasertib_1924	3.19183508055591e-06	< 0.001
GDC0810_1925	5.52169197303392e-05	< 0.001
GSK2578215A_1927	0.0415150970082225	0.0415
I-BRD9_1928	0.0161937715317616	0.0162
WEHI-539_1997	0.017489463765056	0.0175
BPD-00008900_1998	0.00712315536336462	0.0071
Pyridostatin_2044	9.02344481282529e-05	< 0.001
Ulixertinib_2047	0.0390134855630105	0.039
Vinorelbine_2048	0.039380361478573	0.0394
Uprosertib_2106	0.00463918104549018	0.0046
VE821_2111	0.00516777366598795	0.0052
AZD6482_2169	0.00388184820449865	0.0039
AT13148_2170	0.00484832317294327	0.0048
