# Supplementary material
Source: Research Square preprint supplement (doi:10.21203/rs.3.rs-8968229/v1)
Supplement: Supplementary file 2 [file 757c1384afa1901c4c0738b6.xlsx]

## Sheet: gene_sig0.05_wilcox
	p_value	statistic	p_adj
NUTF2	1.62662999915259e-16	410	2.27728199881363e-14
SKA2	2.95507214518621e-15	592	2.06855050163035e-13
DCUN1D5	9.3854238714037e-14	820	4.37986447332172e-12
PSMB1	1.33553799754371e-13	844	4.67438299140297e-12
YIF1A	1.95242758411222e-13	870	5.46679723551421e-12
POLR2K	3.19587419253493e-13	904	7.4570397825815e-12
NMI	6.54520501867513e-13	954	1.30904100373503e-11
SNW1	1.09040221172978e-12	990	1.90820387052711e-11
GNAI1	1.40485994543171e-12	1008	2.18533769289378e-11
LSM5	2.74494443510274e-12	1056	3.84292220914384e-11
TIMMDC1	3.52097460222173e-12	1074	4.48124040282765e-11
EWSR1	4.21144641692767e-12	1087	4.91335415308229e-11
MRPS23	6.01381972919309e-12	1113	6.47642124682333e-11
IFI16	7.37760866555277e-12	1128	7.37760866555277e-11
PDAP1	8.00424052670041e-12	1134	7.47062449158705e-11
RBCK1	1.91933144290914e-11	1199	1.6794150125455e-10
SUMO3	2.10692308310675e-11	1206	1.73511312726438e-10
ENY2	3.57730358599776e-11	1246	2.78234723355381e-10
COA6	3.92215394768481e-11	1253	2.89000817197828e-10
SLC25A39	4.35618890510248e-11	1261	3.04933223357173e-10
SMDT1	7.14849482321274e-11	8001	4.76566321547516e-10
PSMB9	2.73220534651666e-10	1404	1.73867612960151e-09
MRPS12	2.98334138403137e-10	1411	1.8159469294104e-09
IFI44L	7.99654316766079e-10	1490.5	4.66465018113546e-09
SNRPE	8.65894132124048e-10	1497	4.84900713989467e-09
SSB	9.78367915537099e-10	1507	5.13526408664703e-09
ATP6V1E1	9.90372359567642e-10	1508	5.13526408664703e-09
RTRAF	1.47786383169091e-09	1541	7.38931915845456e-09
HNRNPM	2.62644199893154e-09	1589	1.26793751672557e-08
TIPRL	4.6281456381477e-09	1637	2.15980129780226e-08
C7orf50	6.72019819445869e-09	1669	3.03492821685231e-08
PYCARD	1.26457782480019e-08	1724	5.53252798350083e-08
ILF2	1.40091949192297e-08	1733	5.94329481421865e-08
PSMC5	3.07503521420267e-08	1803	1.26619097055404e-07
KPNA4	3.75302172952434e-08	1821	1.50120869180974e-07
IMP4	3.87930377270977e-08	1824	1.50861813383158e-07
PAPOLA	4.19017137800442e-08	1831	1.58547025113681e-07
BTF3L4	1.80776163783113e-07	1967	6.66017445516733e-07
RHEB	2.13745734808445e-07	1983	7.67292381363647e-07
ID3	4.18098143087269e-07	2048	1.46334350080544e-06
MT-ND5	6.2697251571001e-07	7212	2.13567594512201e-06
PA2G4	6.46165454030224e-07	2091	2.13567594512201e-06
NDUFV2	6.55957611716047e-07	2092.5	2.13567594512201e-06
QARS1	8.05264346617418e-07	7187	2.56220473923724e-06
NUCKS1	8.37985922702006e-07	2117	2.60706731507291e-06
ARL6IP4	9.6735554608002e-07	2131.5	2.94412557502615e-06
APEX1	2.06104478369767e-06	2209	6.13928233441859e-06
CLEC2B	2.69387910121998e-06	2237	7.77034543075914e-06
PIN1	2.7196209007657e-06	2238	7.77034543075914e-06
MT-ND1	7.78104906870297e-06	6949	2.17869373923683e-05
PSMG2	9.58271799893281e-06	2374	2.63055003892273e-05
HNRNPAB	1.38247366939117e-05	2415	3.72204449451469e-05
EIF3J	2.21948002883804e-05	2469	5.86277743466652e-05
TIMM10	3.05121173656112e-05	2506	7.91054894663995e-05
HNRNPA0	4.03585526520593e-05	2539	0.000102730861296151
MT-CYB	4.97525205263664e-05	6736	0.000124381301315916
ARL8B	5.22974225855013e-05	2570	0.000128449809859126
RPL17	5.49653550484021e-05	2576	0.000132674994944419
UQCC2	6.22105505095616e-05	2591	0.00014756528177645
TSSC4	6.32422636184784e-05	2593	0.00014756528177645
RPL30	6.80886919247435e-05	2602	0.000156269129007608
TRAPPC4	7.94980880480737e-05	2621	0.000179511811721457
MAP3K13	8.14570077644365e-05	2624	0.000181015572809859
MT-ND3	9.12172934147662e-05	6662	0.000199537829344801
PPP4R3B	0.000115974856291133	2668	0.000249791998165517
RPS20	0.000191489560915765	2732	0.000406189977700107
PARK7	0.000231996572947335	2757	0.000484768958397415
PCNP	0.000272102416031292	2778	0.000560210856535013
RPS23	0.000386579158167671	6475	0.000784363509325709
MT-CO1	0.000451098214232779	6454	0.000902196428465558
SELENOK	0.000461096031268896	6451	0.000909203441938667
CZIB	0.000537084803131494	2870	0.00104433156164457
MAGEA1	0.000577918152600534	3021.5	0.00110833618306952
GTF3C6	0.000735600987327629	2914	0.00139167754359281
HPF1	0.000783816564293733	2923	0.0014631242533483
NDUFA11	0.000933571629801795	2948	0.00171973721279278
MT-ND2	0.00119618587376054	6316	0.00217488340683735
IMP3	0.00135168658317111	3002	0.00242610412364045
ATP6V1B2	0.00154620347708074	3022	0.00274010742773802
NDUFB5	0.002001531438325	3061	0.00350268001706875
CHCHD1	0.00274725260610343	3110	0.00474833783770963
SCAND1	0.00330042333189694	3139	0.00563486910323867
SRRM1	0.00346994180352638	3147	0.00585291388546618
MRPL43	0.00395329215483853	3168	0.00658882025806421
TOMM20	0.00420429278375988	3178	0.00692471752619274
NAP1L1	0.00455218588318515	3191	0.00741053515867349
MRPL44	0.00486670155996468	3202	0.00774247975448926
MT-CO3	0.00486670155996468	6098	0.00774247975448926
VDAC1	0.00542397165603891	3220	0.00853209024545446
GTF2H5	0.00657785910070598	3252.5	0.0102322252677649
NDUFS8	0.00711886901552725	3266	0.0109521061777342
NDUFAB1	0.00732916587584386	3271	0.0111530785067189
IMPDH2	0.00932765072023763	5987	0.0140416247401427
PDLIM2	0.00978681915684985	5978.5	0.0145761136378615
PKP3	0.0104401043325777	3333	0.0153854169111671
COX5A	0.0129537952110782	5928	0.0188909513494891
HBS1L	0.0136789828324062	3382	0.0197428618199677
SCP2	0.0150750735815372	5900	0.021535819402196
ALDOA	0.018344174400159	3437	0.0259412567274976
UQCRFS1	0.0205691011218128	5841	0.0287967415705379
RNASEH2C	0.0219915610188048	3472	0.0304833519072542
MT-ATP6	0.0250949803618516	5802	0.0344440906927374
MT-ND4	0.0277337008143762	5782	0.037696292369055
NDUFA5	0.0296471701893165	5768.5	0.039909652177926
HADHB	0.0355685332428204	5731	0.0474247109904271
RPS7	0.0362559790135055	3573	0.0478852553008563
BRK1	0.0374862678205413	5720	0.0490474532231381
