# Supplementary material
Source: Research Square preprint supplement (doi:10.21203/rs.3.rs-8968229/v1)
Supplement: Supplementary file 4 [file c163e95ffe5ff429d238452a.xlsx]

## Sheet: GO_enrich
ONTOLOGY	ID	Description	GeneRatio	BgRatio	pvalue	p.adjust	qvalue	geneID	Count
BP	GO:0006119	oxidative phosphorylation	11/93	147/18903	1.52295683704759e-10	1.52295683704759e-10	2.01992169966311e-07	COA6/NDUFV2/UQCC2/PARK7/NDUFA11/NDUFB5/NDUFS8/NDUFAB1/COX5A/UQCRFS1/NDUFA5	11
BP	GO:0042773	ATP synthesis coupled electron transport	9/93	101/18903	1.63859505177796e-09	1.63859505177796e-09	7.24431496575519e-07	COA6/NDUFV2/PARK7/NDUFB5/NDUFS8/NDUFAB1/COX5A/UQCRFS1/NDUFA5	9
BP	GO:0042775	mitochondrial ATP synthesis coupled electron transport	9/93	101/18903	1.63859505177796e-09	1.63859505177796e-09	7.24431496575519e-07	COA6/NDUFV2/PARK7/NDUFB5/NDUFS8/NDUFAB1/COX5A/UQCRFS1/NDUFA5	9
BP	GO:0009060	aerobic respiration	11/93	194/18903	2.93416113055315e-09	2.93416113055315e-09	9.72906059078148e-07	COA6/NDUFV2/UQCC2/PARK7/NDUFA11/NDUFB5/NDUFS8/NDUFAB1/COX5A/UQCRFS1/NDUFA5	11
BP	GO:0022904	respiratory electron transport chain	9/93	122/18903	8.79682370663264e-09	8.79682370663264e-09	2.33347323586466e-06	COA6/NDUFV2/PARK7/NDUFB5/NDUFS8/NDUFAB1/COX5A/UQCRFS1/NDUFA5	9
BP	GO:0019646	aerobic electron transport chain	8/93	93/18903	1.82760344846765e-08	1.82760344846765e-08	4.03996551766534e-06	NDUFV2/PARK7/NDUFB5/NDUFS8/NDUFAB1/COX5A/UQCRFS1/NDUFA5	8
BP	GO:0045333	cellular respiration	11/93	240/18903	2.68182792929095e-08	2.68182792929095e-08	5.08135818181443e-06	COA6/NDUFV2/UQCC2/PARK7/NDUFA11/NDUFB5/NDUFS8/NDUFAB1/COX5A/UQCRFS1/NDUFA5	11
BP	GO:0009206	purine ribonucleoside triphosphate biosynthetic process	8/93	117/18903	1.11160822044889e-07	1.11160822044889e-07	1.75027514388802e-05	NDUFV2/NDUFA11/NDUFB5/NDUFS8/NDUFAB1/IMPDH2/ALDOA/NDUFA5	8
BP	GO:0009145	purine nucleoside triphosphate biosynthetic process	8/93	118/18903	1.18768670478116e-07	1.18768670478116e-07	1.75027514388802e-05	NDUFV2/NDUFA11/NDUFB5/NDUFS8/NDUFAB1/IMPDH2/ALDOA/NDUFA5	8
BP	GO:0009201	ribonucleoside triphosphate biosynthetic process	8/93	123/18903	1.63893822374311e-07	1.63893822374311e-07	2.17374964412244e-05	NDUFV2/NDUFA11/NDUFB5/NDUFS8/NDUFAB1/IMPDH2/ALDOA/NDUFA5	8
BP	GO:0006120	mitochondrial electron transport, NADH to ubiquinone	6/93	51/18903	1.81500454469308e-07	1.81500454469308e-07	2.1884265323572e-05	NDUFV2/PARK7/NDUFB5/NDUFS8/NDUFAB1/NDUFA5	6
BP	GO:0022900	electron transport chain	9/93	176/18903	2.10641662640209e-07	2.10641662640209e-07	2.32814469233915e-05	COA6/NDUFV2/PARK7/NDUFB5/NDUFS8/NDUFAB1/COX5A/UQCRFS1/NDUFA5	9
BP	GO:0009142	nucleoside triphosphate biosynthetic process	8/93	134/18903	3.17305250108593e-07	3.17305250108593e-07	3.23728433309172e-05	NDUFV2/NDUFA11/NDUFB5/NDUFS8/NDUFAB1/IMPDH2/ALDOA/NDUFA5	8
BP	GO:0033108	mitochondrial respiratory chain complex assembly	7/93	99/18903	5.71771037579829e-07	5.71771037579829e-07	5.41677825075628e-05	UQCC2/NDUFA11/NDUFB5/NDUFS8/NDUFAB1/UQCRFS1/NDUFA5	7
BP	GO:0015980	energy derivation by oxidation of organic compounds	11/93	333/18903	7.23896600278871e-07	7.23896600278871e-07	6.40076993930791e-05	COA6/NDUFV2/UQCC2/PARK7/NDUFA11/NDUFB5/NDUFS8/NDUFAB1/COX5A/UQCRFS1/NDUFA5	11
BP	GO:0006754	ATP biosynthetic process	7/93	106/18903	9.102531330135e-07	9.102531330135e-07	7.36659682686508e-05	NDUFV2/NDUFA11/NDUFB5/NDUFS8/NDUFAB1/ALDOA/NDUFA5	7
BP	GO:0042776	proton motive force-driven mitochondrial ATP synthesis	6/93	67/18903	9.44210625030722e-07	9.44210625030722e-07	7.36659682686508e-05	NDUFV2/NDUFA11/NDUFB5/NDUFS8/NDUFAB1/NDUFA5	6
BP	GO:0015986	proton motive force-driven ATP synthesis	6/93	76/18903	1.99631481608047e-06	1.99631481608047e-06	0.000147096881184877	NDUFV2/NDUFA11/NDUFB5/NDUFS8/NDUFAB1/NDUFA5	6
BP	GO:0009205	purine ribonucleoside triphosphate metabolic process	9/93	242/18903	3.00727366084558e-06	3.00727366084558e-06	0.000209926028402517	NDUFV2/NDUFA11/ATP6V1B2/NDUFB5/NDUFS8/NDUFAB1/IMPDH2/ALDOA/NDUFA5	9
BP	GO:0009144	purine nucleoside triphosphate metabolic process	9/93	247/18903	3.55412369454401e-06	3.55412369454401e-06	0.000235694518690813	NDUFV2/NDUFA11/ATP6V1B2/NDUFB5/NDUFS8/NDUFAB1/IMPDH2/ALDOA/NDUFA5	9
BP	GO:0009199	ribonucleoside triphosphate metabolic process	9/93	249/18903	3.79567463736594e-06	3.79567463736594e-06	0.00023972681920206	NDUFV2/NDUFA11/ATP6V1B2/NDUFB5/NDUFS8/NDUFAB1/IMPDH2/ALDOA/NDUFA5	9
BP	GO:0009141	nucleoside triphosphate metabolic process	9/93	267/18903	6.68429964475243e-06	6.68429964475243e-06	0.000402976916382204	NDUFV2/NDUFA11/ATP6V1B2/NDUFB5/NDUFS8/NDUFAB1/IMPDH2/ALDOA/NDUFA5	9
BP	GO:0051438	regulation of ubiquitin-protein transferase activity	5/93	56/18903	8.10202137532119e-06	8.10202137532119e-06	0.000467210385945295	DCUN1D5/PIN1/RPS20/PARK7/RPS7	5
BP	GO:0010257	NADH dehydrogenase complex assembly	5/93	59/18903	1.0496095687271e-05	1.0496095687271e-05	0.000556845497514166	NDUFA11/NDUFB5/NDUFS8/NDUFAB1/NDUFA5	5
BP	GO:0032981	mitochondrial respiratory chain complex I assembly	5/93	59/18903	1.0496095687271e-05	1.0496095687271e-05	0.000556845497514166	NDUFA11/NDUFB5/NDUFS8/NDUFAB1/NDUFA5	5
BP	GO:0046034	ATP metabolic process	8/93	217/18903	1.16905205457687e-05	1.16905205457687e-05	0.000596358537962288	NDUFV2/NDUFA11/ATP6V1B2/NDUFB5/NDUFS8/NDUFAB1/ALDOA/NDUFA5	8
BP	GO:0009152	purine ribonucleotide biosynthetic process	8/93	220/18903	1.29153760413577e-05	1.29153760413577e-05	0.000634439524838626	NDUFV2/NDUFA11/NDUFB5/NDUFS8/NDUFAB1/IMPDH2/ALDOA/NDUFA5	8
BP	GO:0009260	ribonucleotide biosynthetic process	8/93	234/18903	2.01609914621124e-05	2.01609914621124e-05	0.000954994332415851	NDUFV2/NDUFA11/NDUFB5/NDUFS8/NDUFAB1/IMPDH2/ALDOA/NDUFA5	8
BP	GO:0046390	ribose phosphate biosynthetic process	8/93	241/18903	2.49059890445134e-05	2.49059890445134e-05	0.00113420615698781	NDUFV2/NDUFA11/NDUFB5/NDUFS8/NDUFAB1/IMPDH2/ALDOA/NDUFA5	8
BP	GO:0006164	purine nucleotide biosynthetic process	8/93	242/18903	2.56546630747242e-05	2.56546630747242e-05	0.00113420615698781	NDUFV2/NDUFA11/NDUFB5/NDUFS8/NDUFAB1/IMPDH2/ALDOA/NDUFA5	8
BP	GO:0072522	purine-containing compound biosynthetic process	8/93	251/18903	3.3284382028835e-05	3.3284382028835e-05	0.00142405165895864	NDUFV2/NDUFA11/NDUFB5/NDUFS8/NDUFAB1/IMPDH2/ALDOA/NDUFA5	8
BP	GO:0032543	mitochondrial translation	6/93	131/18903	4.59536186777932e-05	4.59536186777932e-05	0.00190465656361906	MRPS23/MRPS12/UQCC2/CHCHD1/MRPL43/MRPL44	6
BP	GO:0006401	RNA catabolic process	8/93	299/18903	0.000113450822735969	0.000113450822735969	0.00455974598556049	LSM5/SSB/HNRNPM/APEX1/HNRNPAB/HNRNPA0/PKP3/RNASEH2C	8
BP	GO:0009165	nucleotide biosynthetic process	8/93	304/18903	0.000127183215965147	0.000127183215965147	0.00496132669090049	NDUFV2/NDUFA11/NDUFB5/NDUFS8/NDUFAB1/IMPDH2/ALDOA/NDUFA5	8
BP	GO:1901293	nucleoside phosphate biosynthetic process	8/93	306/18903	0.000133047790175768	0.000133047790175768	0.00504181099613437	NDUFV2/NDUFA11/NDUFB5/NDUFS8/NDUFAB1/IMPDH2/ALDOA/NDUFA5	8
BP	GO:1903311	regulation of mRNA metabolic process	8/93	309/18903	0.000142262514781852	0.000142262514781852	0.00515686433347118	SNW1/HNRNPM/PAPOLA/APEX1/HNRNPAB/HNRNPA0/SRRM1/PKP3	8
BP	GO:0002181	cytoplasmic translation	6/93	161/18903	0.000143860143905962	0.000143860143905962	0.00515686433347118	EIF3J/RPL17/RPL30/RPS20/RPS23/RPS7	6
BP	GO:0140053	mitochondrial gene expression	6/93	163/18903	0.000153888858722936	0.000153888858722936	0.00537119008285041	MRPS23/MRPS12/UQCC2/CHCHD1/MRPL43/MRPL44	6
BP	GO:0051444	negative regulation of ubiquitin-protein transferase activity	3/93	22/18903	0.000165897402980786	0.000165897402980786	0.0056418550001563	RPS20/PARK7/RPS7	3
BP	GO:0006402	mRNA catabolic process	7/93	248/18903	0.000223235329727817	0.000223235329727817	0.00740201356465919	LSM5/SSB/HNRNPM/APEX1/HNRNPAB/HNRNPA0/PKP3	7
BP	GO:0009150	purine ribonucleotide metabolic process	9/93	447/18903	0.000354513447558526	0.000354513447558526	0.0112793194046431	NDUFV2/NDUFA11/ATP6V1B2/NDUFB5/NDUFS8/NDUFAB1/IMPDH2/ALDOA/NDUFA5	9
BP	GO:0016072	rRNA metabolic process	7/93	268/18903	0.000357178447813697	0.000357178447813697	0.0112793194046431	IMP4/PA2G4/GTF3C6/IMP3/MRPL44/GTF2H5/RPS7	7
BP	GO:0009259	ribonucleotide metabolic process	9/93	466/18903	0.000479407052847227	0.000479407052847227	0.0146825680181327	NDUFV2/NDUFA11/ATP6V1B2/NDUFB5/NDUFS8/NDUFAB1/IMPDH2/ALDOA/NDUFA5	9
BP	GO:0006403	RNA localization	6/93	202/18903	0.000487088367585673	0.000487088367585673	0.0146825680181327	NUTF2/ENY2/SSB/RTRAF/HNRNPAB/TOMM20	6
BP	GO:0019693	ribose phosphate metabolic process	9/93	475/18903	0.000550111580641054	0.000550111580641054	0.0161023534088335	NDUFV2/NDUFA11/ATP6V1B2/NDUFB5/NDUFS8/NDUFAB1/IMPDH2/ALDOA/NDUFA5	9
BP	GO:0006163	purine nucleotide metabolic process	9/93	476/18903	0.000558470511084146	0.000558470511084146	0.0161023534088335	NDUFV2/NDUFA11/ATP6V1B2/NDUFB5/NDUFS8/NDUFAB1/IMPDH2/ALDOA/NDUFA5	9
BP	GO:0042274	ribosomal small subunit biogenesis	4/93	78/18903	0.000592972921484663	0.000592972921484663	0.0165141442045035	IMP4/IMP3/GTF2H5/RPS7	4
BP	GO:0031396	regulation of protein ubiquitination	6/93	210/18903	0.000597654742639175	0.000597654742639175	0.0165141442045035	DCUN1D5/NMI/PIN1/RPS20/PARK7/RPS7	6
BP	GO:0072332	intrinsic apoptotic signaling pathway by p53 class mediator	4/93	81/18903	0.000683908175604163	0.000683908175604163	0.0185118002419172	SNW1/IFI16/PYCARD/RPS7	4
BP	GO:0017004	cytochrome complex assembly	3/93	39/18903	0.000926713020323126	0.000926713020323126	0.024407770173208	COA6/UQCC2/UQCRFS1	3
BP	GO:0006364	rRNA processing	6/93	229/18903	0.000938536876898355	0.000938536876898355	0.024407770173208	IMP4/PA2G4/IMP3/MRPL44/GTF2H5/RPS7	6
BP	GO:0017062	respiratory chain complex III assembly	2/93	10/18903	0.00105024212383502	0.00105024212383502	0.0259943564178205	UQCC2/UQCRFS1	2
BP	GO:0034551	mitochondrial respiratory chain complex III assembly	2/93	10/18903	0.00105024212383502	0.00105024212383502	0.0259943564178205	UQCC2/UQCRFS1	2
BP	GO:1990542	mitochondrial transmembrane transport	4/93	91/18903	0.00105834165415412	0.00105834165415412	0.0259943564178205	SLC25A39/SMDT1/TOMM20/VDAC1	4
BP	GO:1902600	proton transmembrane transport	5/93	160/18903	0.0011648261699139	0.0011648261699139	0.0280895880208902	ATP6V1E1/PARK7/ATP6V1B2/COX5A/UQCRFS1	5
BP	GO:0034655	nucleobase-containing compound catabolic process	8/93	428/18903	0.00122973385024774	0.00122973385024774	0.0289281602597358	LSM5/SSB/HNRNPM/APEX1/HNRNPAB/HNRNPA0/PKP3/RNASEH2C	8
BP	GO:0050657	nucleic acid transport	5/93	163/18903	0.00126503303992972	0.00126503303992972	0.0289281602597358	NUTF2/ENY2/SSB/RTRAF/TOMM20	5
BP	GO:0050658	RNA transport	5/93	163/18903	0.00126503303992972	0.00126503303992972	0.0289281602597358	NUTF2/ENY2/SSB/RTRAF/TOMM20	5
BP	GO:0042771	intrinsic apoptotic signaling pathway in response to DNA damage by p53 class mediator	3/93	44/18903	0.00131933805070437	0.00131933805070437	0.0296586252254684	SNW1/IFI16/PYCARD	3
BP	GO:0051236	establishment of RNA localization	5/93	166/18903	0.00137148051371136	0.00137148051371136	0.0303169376715143	NUTF2/ENY2/SSB/RTRAF/TOMM20	5
BP	GO:0034470	ncRNA processing	8/93	439/18903	0.00144430266987893	0.00144430266987893	0.0314033022268758	SSB/RTRAF/IMP4/PA2G4/IMP3/MRPL44/GTF2H5/RPS7	8
BP	GO:0036444	calcium import into the mitochondrion	2/93	12/18903	0.00153051331481892	0.00153051331481892	0.0315148479496233	SMDT1/VDAC1	2
BP	GO:1904667	negative regulation of ubiquitin protein ligase activity	2/93	12/18903	0.00153051331481892	0.00153051331481892	0.0315148479496233	RPS20/RPS7	2
BP	GO:1903320	regulation of protein modification by small protein conjugation or removal	6/93	252/18903	0.00153252517088613	0.00153252517088613	0.0315148479496233	DCUN1D5/NMI/PIN1/RPS20/PARK7/RPS7	6
BP	GO:0010506	regulation of autophagy	7/93	344/18903	0.00154447766737241	0.00154447766737241	0.0315148479496233	IFI16/ATP6V1E1/PYCARD/RHEB/PARK7/ATP6V1B2/VDAC1	7
BP	GO:0072331	signal transduction by p53 class mediator	5/93	173/18903	0.00164544673902406	0.00164544673902406	0.0330663937985697	SNW1/IFI16/PYCARD/RPS20/RPS7	5
BP	GO:1903599	positive regulation of autophagy of mitochondrion	2/93	13/18903	0.00180300393698323	0.00180300393698323	0.0356918297030459	PARK7/VDAC1	2
BP	GO:0032688	negative regulation of interferon-beta production	2/93	14/18903	0.00209678003403136	0.00209678003403136	0.0408969480321907	NMI/PYCARD	2
BP	GO:0046700	heterocycle catabolic process	8/93	468/18903	0.00215513887583317	0.00215513887583317	0.0413777403881934	LSM5/SSB/HNRNPM/APEX1/HNRNPAB/HNRNPA0/PKP3/RNASEH2C	8
BP	GO:0008380	RNA splicing	8/93	469/18903	0.00218382518715465	0.00218382518715465	0.0413777403881934	SNW1/LSM5/ENY2/SNRPE/RTRAF/HNRNPM/ARL6IP4/SRRM1	8
BP	GO:0044270	cellular nitrogen compound catabolic process	8/93	474/18903	0.00233180616604955	0.00233180616604955	0.0435593145918819	LSM5/SSB/HNRNPM/APEX1/HNRNPAB/HNRNPA0/PKP3/RNASEH2C	8
BP	GO:0051348	negative regulation of transferase activity	6/93	276/18903	0.00242116663946855	0.00242116663946855	0.0446004380954732	RTRAF/PYCARD/QARS1/RPS20/PARK7/RPS7	6
BP	GO:0061013	regulation of mRNA catabolic process	5/93	190/18903	0.00247619505557812	0.00247619505557812	0.0449892684935606	HNRNPM/APEX1/HNRNPAB/HNRNPA0/PKP3	5
BP	GO:0030490	maturation of SSU-rRNA	3/93	55/18903	0.00251353547243827	0.00251353547243827	0.0450505646553658	IMP4/IMP3/GTF2H5	3
BP	GO:0019439	aromatic compound catabolic process	8/93	489/18903	0.00282358725109278	0.00282358725109278	0.049275899395802	LSM5/SSB/HNRNPM/APEX1/HNRNPAB/HNRNPA0/PKP3/RNASEH2C	8
BP	GO:0022613	ribonucleoprotein complex biogenesis	8/93	489/18903	0.00282358725109278	0.00282358725109278	0.049275899395802	SNRPE/IMP4/PA2G4/EIF3J/IMP3/MRPL44/GTF2H5/RPS7	8
BP	GO:0043923	positive regulation by host of viral transcription	2/93	17/18903	0.00310371395758276	0.00310371395758276	0.0534611016617126	SNW1/NUCKS1	2
BP	GO:0006851	mitochondrial calcium ion transmembrane transport	2/93	18/18903	0.00348053233272855	0.00348053233272855	0.0591831408804044	SMDT1/VDAC1	2
BP	GO:0097193	intrinsic apoptotic signaling pathway	6/93	298/18903	0.00353479104434407	0.00353479104434407	0.0593449262608064	SNW1/IFI16/PYCARD/PARK7/SELENOK/RPS7	6
BP	GO:0097202	activation of cysteine-type endopeptidase activity	2/93	19/18903	0.00387759393395211	0.00387759393395211	0.0642864257471007	IFI16/PYCARD	2
BP	GO:0042254	ribosome biogenesis	6/93	310/18903	0.0042833725765845	0.0042833725765845	0.0701370948212667	IMP4/PA2G4/IMP3/MRPL44/GTF2H5/RPS7	6
BP	GO:2001235	positive regulation of apoptotic signaling pathway	4/93	135/18903	0.00444801653636377	0.00444801653636377	0.0719448117563331	RBCK1/PYCARD/PARK7/RPS7	4
BP	GO:0015931	nucleobase-containing compound transport	5/93	223/18903	0.00489916702199212	0.00489916702199212	0.078287259958276	NUTF2/ENY2/SSB/RTRAF/TOMM20	5
BP	GO:1902373	negative regulation of mRNA catabolic process	3/93	70/18903	0.00497372564694071	0.00497372564694071	0.0785325102148532	HNRNPAB/HNRNPA0/PKP3	3
BP	GO:0009895	negative regulation of catabolic process	6/93	332/18903	0.00595201554604253	0.00595201554604253	0.0928735552695181	PIN1/HNRNPAB/HNRNPA0/PARK7/PKP3/RPS7	6
BP	GO:0071479	cellular response to ionizing radiation	3/93	75/18903	0.00602812792107305	0.00602812792107305	0.0929674563103065	IFI16/NUCKS1/GTF2H5	3
BP	GO:1904666	regulation of ubiquitin protein ligase activity	2/93	24/18903	0.00615946379516976	0.00615946379516976	0.0939010814508638	RPS20/RPS7	2
BP	GO:0010822	positive regulation of mitochondrion organization	3/93	76/18903	0.00625377648408902	0.00625377648408902	0.0942554828941646	PYCARD/PARK7/VDAC1	3
BP	GO:0031330	negative regulation of cellular catabolic process	5/93	247/18903	0.00748537221147325	0.00748537221147325	0.111550194990613	HNRNPAB/HNRNPA0/PARK7/PKP3/RPS7	5
BP	GO:1902369	negative regulation of RNA catabolic process	3/93	82/18903	0.0077134136593269	0.0077134136593269	0.113671359190081	HNRNPAB/HNRNPA0/PKP3	3
BP	GO:0016241	regulation of macroautophagy	4/93	160/18903	0.00805619977459078	0.00805619977459078	0.117418296309825	ATP6V1E1/RHEB/ATP6V1B2/VDAC1	4
BP	GO:0031397	negative regulation of protein ubiquitination	3/93	84/18903	0.00824085617442799	0.00824085617442799	0.118804105031799	RPS20/PARK7/RPS7	3
BP	GO:0051100	negative regulation of binding	4/93	164/18903	0.00877005993317488	0.00877005993317488	0.125019569347071	IFI16/SUMO3/PIN1/PARK7	4
BP	GO:0032367	intracellular cholesterol transport	2/93	29/18903	0.00891744407456582	0.00891744407456582	0.125019569347071	ARL8B/SCP2	2
BP	GO:0051168	nuclear export	4/93	165/18903	0.00895477470918502	0.00895477470918502	0.125019569347071	NUTF2/ENY2/SSB/PARK7	4
BP	GO:1901798	positive regulation of signal transduction by p53 class mediator	2/93	30/18903	0.00952404154824446	0.00952404154824446	0.131582152969167	RPS20/RPS7	2
BP	GO:0002230	positive regulation of defense response to virus by host	2/93	31/18903	0.0101485304870477	0.0101485304870477	0.13876449716419	PYCARD/SELENOK	2
BP	GO:0032366	intracellular sterol transport	2/93	32/18903	0.0107907240887673	0.0107907240887673	0.141702056819664	ARL8B/SCP2	2
BP	GO:0051443	positive regulation of ubiquitin-protein transferase activity	2/93	32/18903	0.0107907240887673	0.0107907240887673	0.141702056819664	DCUN1D5/PIN1	2
BP	GO:0080111	DNA demethylation	2/93	32/18903	0.0107907240887673	0.0107907240887673	0.141702056819664	APEX1/HNRNPAB	2
BP	GO:1903715	regulation of aerobic respiration	2/93	32/18903	0.0107907240887673	0.0107907240887673	0.141702056819664	UQCC2/PARK7	2
BP	GO:1903312	negative regulation of mRNA metabolic process	3/93	94/18903	0.011192746050143	0.011192746050143	0.14554035111641	HNRNPAB/HNRNPA0/PKP3	3
BP	GO:0051204	protein insertion into mitochondrial membrane	2/93	33/18903	0.0114504369215477	0.0114504369215477	0.147445585295351	TIMM10/TOMM20	2
BP	GO:1903321	negative regulation of protein modification by small protein conjugation or removal	3/93	96/18903	0.0118471029158494	0.0118471029158494	0.151086535161642	RPS20/PARK7/RPS7	3
BP	GO:0032480	negative regulation of type I interferon production	2/93	34/18903	0.0121274849151617	0.0121274849151617	0.153189283138885	NMI/PYCARD	2
BP	GO:2000406	positive regulation of T cell migration	2/93	35/18903	0.0128216853523368	0.0128216853523368	0.160430223872337	PYCARD/SELENOK	2
BP	GO:0019080	viral gene expression	3/93	100/18903	0.0132207997086639	0.0132207997086639	0.163878087879159	SNW1/SSB/NUCKS1	3
BP	GO:0002504	antigen processing and presentation of peptide or polysaccharide antigen via MHC class II	2/93	36/18903	0.0135328568601328	0.0135328568601328	0.164668272754875	PYCARD/ARL8B	2
BP	GO:1903146	regulation of autophagy of mitochondrion	2/93	36/18903	0.0135328568601328	0.0135328568601328	0.164668272754875	PARK7/VDAC1	2
BP	GO:0008630	intrinsic apoptotic signaling pathway in response to DNA damage	3/93	102/18903	0.0139403457375349	0.0139403457375349	0.167383627813013	SNW1/IFI16/PYCARD	3
BP	GO:0009303	rRNA transcription	2/93	37/18903	0.0142608194013706	0.0142608194013706	0.167383627813013	GTF3C6/GTF2H5	2
BP	GO:0035510	DNA dealkylation	2/93	37/18903	0.0142608194013706	0.0142608194013706	0.167383627813013	APEX1/HNRNPAB	2
BP	GO:0090151	establishment of protein localization to mitochondrial membrane	2/93	37/18903	0.0142608194013706	0.0142608194013706	0.167383627813013	TIMM10/TOMM20	2
BP	GO:0006399	tRNA metabolic process	4/93	195/18903	0.0157271032372522	0.0157271032372522	0.182974608300441	SSB/RTRAF/QARS1/GTF3C6	4
BP	GO:0034504	protein localization to nucleus	5/93	306/18903	0.0175936675811072	0.0175936675811072	0.202910948761511	NUTF2/SUMO3/KPNA4/PIN1/PARK7	5
BP	GO:0050691	regulation of defense response to virus by host	2/93	42/18903	0.0181462887416714	0.0181462887416714	0.205706916909636	PYCARD/SELENOK	2
BP	GO:2000403	positive regulation of lymphocyte migration	2/93	42/18903	0.0181462887416714	0.0181462887416714	0.205706916909636	PYCARD/SELENOK	2
BP	GO:0016236	macroautophagy	5/93	317/18903	0.0201580220463949	0.0201580220463949	0.226575448514341	ATP6V1E1/RHEB/ARL8B/ATP6V1B2/VDAC1	5
BP	GO:0031398	positive regulation of protein ubiquitination	3/93	119/18903	0.0209480990344174	0.0209480990344174	0.233477264779885	DCUN1D5/NMI/PIN1	3
BP	GO:0051101	regulation of DNA binding	3/93	121/18903	0.0218782236600989	0.0218782236600989	0.240979164093114	IFI16/SUMO3/PARK7	3
BP	GO:0006469	negative regulation of protein kinase activity	4/93	216/18903	0.0219845673908757	0.0219845673908757	0.240979164093114	RTRAF/PYCARD/QARS1/PARK7	4
BP	GO:0032365	intracellular lipid transport	2/93	47/18903	0.0224252816323308	0.0224252816323308	0.243795123871758	ARL8B/SCP2	2
BP	GO:0000377	RNA splicing, via transesterification reactions with bulged adenosine as nucleophile	5/93	329/18903	0.0232230899241247	0.0232230899241247	0.244453578148681	SNW1/LSM5/SNRPE/HNRNPM/SRRM1	5
BP	GO:0000398	mRNA splicing, via spliceosome	5/93	329/18903	0.0232230899241247	0.0232230899241247	0.244453578148681	SNW1/LSM5/SNRPE/HNRNPM/SRRM1	5
BP	GO:0006913	nucleocytoplasmic transport	5/93	329/18903	0.0232230899241247	0.0232230899241247	0.244453578148681	NUTF2/ENY2/SSB/KPNA4/PARK7	5
BP	GO:0051169	nuclear transport	5/93	329/18903	0.0232230899241247	0.0232230899241247	0.244453578148681	NUTF2/ENY2/SSB/KPNA4/PARK7	5
BP	GO:0043457	regulation of cellular respiration	2/93	49/18903	0.0242423234617159	0.0242423234617159	0.248004289436968	UQCC2/PARK7	2
BP	GO:2000378	negative regulation of reactive oxygen species metabolic process	2/93	49/18903	0.0242423234617159	0.0242423234617159	0.248004289436968	PARK7/VDAC1	2
BP	GO:2000404	regulation of T cell migration	2/93	49/18903	0.0242423234617159	0.0242423234617159	0.248004289436968	PYCARD/SELENOK	2
BP	GO:0000375	RNA splicing, via transesterification reactions	5/93	333/18903	0.0243083569408457	0.0243083569408457	0.248004289436968	SNW1/LSM5/SNRPE/HNRNPM/SRRM1	5
BP	GO:2000059	negative regulation of ubiquitin-dependent protein catabolic process	2/93	50/18903	0.0251727785333372	0.0251727785333372	0.252932224497647	PARK7/RPS7	2
BP	GO:2001238	positive regulation of extrinsic apoptotic signaling pathway	2/93	50/18903	0.0251727785333372	0.0251727785333372	0.252932224497647	RBCK1/PYCARD	2
BP	GO:0019083	viral transcription	2/93	51/18903	0.0261176396908079	0.0261176396908079	0.260452916584234	SNW1/NUCKS1	2
BP	GO:0043392	negative regulation of DNA binding	2/93	52/18903	0.027076745938358	0.027076745938358	0.267903186818181	IFI16/SUMO3	2
BP	GO:0050769	positive regulation of neurogenesis	4/93	231/18903	0.0272687172297077	0.0272687172297077	0.267903186818181	SNW1/RHEB/MAP3K13/NAP1L1	4
BP	GO:0006383	transcription by RNA polymerase III	2/93	53/18903	0.0280499374854961	0.0280499374854961	0.273552021917377	POLR2K/GTF3C6	2
BP	GO:2000116	regulation of cysteine-type endopeptidase activity	4/93	235/18903	0.0287954749980897	0.0287954749980897	0.278772942739862	IFI16/PSMB9/PYCARD/PARK7	4
BP	GO:1900180	regulation of protein localization to nucleus	3/93	135/18903	0.0290140864248756	0.0290140864248756	0.278853919872946	SUMO3/PIN1/PARK7	3
BP	GO:0006414	translational elongation	2/93	55/18903	0.0300379432964954	0.0300379432964954	0.285371643998543	MRPL44/HBS1L	2
BP	GO:1903322	positive regulation of protein modification by small protein conjugation or removal	3/93	137/18903	0.0301225624220684	0.0301225624220684	0.285371643998543	DCUN1D5/NMI/PIN1	3
BP	GO:0033673	negative regulation of kinase activity	4/93	240/18903	0.0307743789594862	0.0307743789594862	0.289479040604349	RTRAF/PYCARD/QARS1/PARK7	4
BP	GO:0006354	DNA-templated transcription elongation	4/93	241/18903	0.0311795898130539	0.0311795898130539	0.289871438590455	NMI/EWSR1/ENY2/GTF2H5	4
BP	GO:0050684	regulation of mRNA processing	3/93	139/18903	0.0312532023273915	0.0312532023273915	0.289871438590455	SNW1/PAPOLA/SRRM1	3
BP	GO:0032608	interferon-beta production	2/93	57/18903	0.0320804026120028	0.0320804026120028	0.293439617358428	NMI/PYCARD	2
BP	GO:0032648	regulation of interferon-beta production	2/93	57/18903	0.0320804026120028	0.0320804026120028	0.293439617358428	NMI/PYCARD	2
BP	GO:0010212	response to ionizing radiation	3/93	143/18903	0.0335807700091533	0.0335807700091533	0.305059626615236	IFI16/NUCKS1/GTF2H5	3
BP	GO:0006611	protein export from nucleus	2/93	59/18903	0.0341760797132682	0.0341760797132682	0.308355606435503	NUTF2/PARK7	2
BP	GO:0045089	positive regulation of innate immune response	3/93	145/18903	0.0347775816665602	0.0347775816665602	0.311662538405874	NMI/IFI16/PYCARD	3
BP	GO:0051098	regulation of binding	5/93	372/18903	0.0366237459377386	0.0366237459377386	0.325430898527153	IFI16/SUMO3/NUCKS1/PIN1/PARK7	5
BP	GO:2001233	regulation of apoptotic signaling pathway	5/93	374/18903	0.0373423406197143	0.0373423406197143	0.325430898527153	RBCK1/PYCARD/QARS1/PARK7/RPS7	5
BP	GO:0006360	transcription by RNA polymerase I	2/93	62/18903	0.0374167211740023	0.0374167211740023	0.325430898527153	POLR2K/GTF2H5	2
BP	GO:0010821	regulation of mitochondrion organization	3/93	150/18903	0.0378654052916339	0.0378654052916339	0.325430898527153	PYCARD/PARK7/VDAC1	3
BP	GO:0032731	positive regulation of interleukin-1 beta production	2/93	63/18903	0.0385222369169245	0.0385222369169245	0.325430898527153	IFI16/PYCARD	2
BP	GO:0032757	positive regulation of interleukin-8 production	2/93	63/18903	0.0385222369169245	0.0385222369169245	0.325430898527153	PYCARD/PARK7	2
BP	GO:0070059	intrinsic apoptotic signaling pathway in response to endoplasmic reticulum stress	2/93	63/18903	0.0385222369169245	0.0385222369169245	0.325430898527153	PARK7/SELENOK	2
BP	GO:0098781	ncRNA transcription	2/93	63/18903	0.0385222369169245	0.0385222369169245	0.325430898527153	GTF3C6/GTF2H5	2
BP	GO:2001244	positive regulation of intrinsic apoptotic signaling pathway	2/93	63/18903	0.0385222369169245	0.0385222369169245	0.325430898527153	PARK7/RPS7	2
BP	GO:0002218	activation of innate immune response	2/93	64/18903	0.0396401576276934	0.0396401576276934	0.330662685275695	IFI16/PYCARD	2
BP	GO:0016925	protein sumoylation	2/93	64/18903	0.0396401576276934	0.0396401576276934	0.330662685275695	SUMO3/PARK7	2
BP	GO:0050729	positive regulation of inflammatory response	3/93	154/18903	0.0404335634112837	0.0404335634112837	0.333091140230255	NMI/PYCARD/PARK7	3
BP	GO:0051092	positive regulation of NF-kappaB transcription factor activity	3/93	154/18903	0.0404335634112837	0.0404335634112837	0.333091140230255	RBCK1/PYCARD/MAP3K13	3
BP	GO:2001236	regulation of extrinsic apoptotic signaling pathway	3/93	155/18903	0.041089112484274	0.041089112484274	0.336402090514524	RBCK1/PYCARD/PARK7	3
BP	GO:1903051	negative regulation of proteolysis involved in protein catabolic process	2/93	66/18903	0.0419126313851545	0.0419126313851545	0.341039170457182	PARK7/RPS7	2
BP	GO:0051091	positive regulation of DNA-binding transcription factor activity	4/93	266/18903	0.0423396819821621	0.0423396819821621	0.342037748803575	RBCK1/PYCARD/MAP3K13/PARK7	4
BP	GO:0031638	zymogen activation	2/93	67/18903	0.0430668959108629	0.0430668959108629	0.342037748803575	IFI16/PYCARD	2
BP	GO:0051205	protein insertion into membrane	2/93	67/18903	0.0430668959108629	0.0430668959108629	0.342037748803575	TIMM10/TOMM20	2
BP	GO:1901224	positive regulation of NIK/NF-kappaB signaling	2/93	67/18903	0.0430668959108629	0.0430668959108629	0.342037748803575	NMI/RBCK1	2
BP	GO:2000401	regulation of lymphocyte migration	2/93	69/18903	0.0454107671671972	0.0454107671671972	0.347132180662914	PYCARD/SELENOK	2
BP	GO:0032722	positive regulation of chemokine production	2/93	70/18903	0.046600091917793	0.046600091917793	0.347132180662914	PYCARD/SELENOK	2
BP	GO:0002934	desmosome organization	1/93	10/18903	0.0481346917120382	0.0481346917120382	0.347132180662914	PKP3	1
BP	GO:0030388	fructose 1,6-bisphosphate metabolic process	1/93	10/18903	0.0481346917120382	0.0481346917120382	0.347132180662914	ALDOA	1
BP	GO:0032380	regulation of intracellular sterol transport	1/93	10/18903	0.0481346917120382	0.0481346917120382	0.347132180662914	SCP2	1
BP	GO:0032383	regulation of intracellular cholesterol transport	1/93	10/18903	0.0481346917120382	0.0481346917120382	0.347132180662914	SCP2	1
BP	GO:0036109	alpha-linolenic acid metabolic process	1/93	10/18903	0.0481346917120382	0.0481346917120382	0.347132180662914	SCP2	1
BP	GO:0042939	tripeptide transport	1/93	10/18903	0.0481346917120382	0.0481346917120382	0.347132180662914	SLC25A39	1
BP	GO:0044351	macropinocytosis	1/93	10/18903	0.0481346917120382	0.0481346917120382	0.347132180662914	PYCARD	1
BP	GO:0046689	response to mercury ion	1/93	10/18903	0.0481346917120382	0.0481346917120382	0.347132180662914	PARK7	1
BP	GO:0051409	response to nitrosative stress	1/93	10/18903	0.0481346917120382	0.0481346917120382	0.347132180662914	PARK7	1
BP	GO:0098779	positive regulation of mitophagy in response to mitochondrial depolarization	1/93	10/18903	0.0481346917120382	0.0481346917120382	0.347132180662914	VDAC1	1
BP	GO:2000601	positive regulation of Arp2/3 complex-mediated actin nucleation	1/93	10/18903	0.0481346917120382	0.0481346917120382	0.347132180662914	BRK1	1
BP	GO:0051962	positive regulation of nervous system development	4/93	279/18903	0.0489290514380657	0.0489290514380657	0.347132180662914	SNW1/RHEB/MAP3K13/NAP1L1	4
CC	GO:0098798	mitochondrial protein-containing complex	18/94	295/19869	2.38976033224965e-15	2.38976033224965e-15	4.95560826792823e-13	MRPS23/SMDT1/MRPS12/NDUFV2/TIMM10/NDUFA11/NDUFB5/CHCHD1/MRPL43/TOMM20/MRPL44/VDAC1/NDUFS8/NDUFAB1/COX5A/UQCRFS1/NDUFA5/HADHB	18
CC	GO:0005743	mitochondrial inner membrane	19/94	498/19869	1.72356935518462e-12	1.72356935518462e-12	1.78706927879668e-10	TIMMDC1/MRPS23/SLC25A39/SMDT1/MRPS12/NDUFV2/TIMM10/UQCC2/NDUFA11/NDUFB5/CHCHD1/MRPL43/MRPL44/NDUFS8/NDUFAB1/COX5A/UQCRFS1/NDUFA5/HADHB	19
CC	GO:0098803	respiratory chain complex	9/94	91/19869	4.57602811463775e-10	4.57602811463775e-10	3.1630790827496e-08	COA6/NDUFV2/NDUFA11/NDUFB5/NDUFS8/NDUFAB1/COX5A/UQCRFS1/NDUFA5	9
CC	GO:0070469	respirasome	9/94	101/19869	1.17308371234696e-09	1.17308371234696e-09	6.08151292979872e-08	COA6/NDUFV2/NDUFA11/NDUFB5/NDUFS8/NDUFAB1/COX5A/UQCRFS1/NDUFA5	9
CC	GO:0098800	inner mitochondrial membrane protein complex	10/94	158/19869	3.87173440924093e-09	3.87173440924093e-09	1.60575090235887e-07	SMDT1/NDUFV2/TIMM10/NDUFA11/NDUFB5/NDUFS8/NDUFAB1/COX5A/UQCRFS1/NDUFA5	10
CC	GO:0005840	ribosome	11/94	232/19869	1.27944140404854e-08	1.27944140404854e-08	4.37993928273371e-07	MRPS23/MRPS12/APEX1/RPL17/RPL30/RPS20/RPS23/CHCHD1/MRPL43/MRPL44/RPS7	11
CC	GO:0005746	mitochondrial respirasome	8/94	94/19869	1.47850742285173e-08	1.47850742285173e-08	4.37993928273371e-07	NDUFV2/NDUFA11/NDUFB5/NDUFS8/NDUFAB1/COX5A/UQCRFS1/NDUFA5	8
CC	GO:0044391	ribosomal subunit	10/94	188/19869	2.05643579699875e-08	2.05643579699875e-08	5.33049805274677e-07	MRPS23/MRPS12/RPL17/RPL30/RPS20/RPS23/CHCHD1/MRPL43/MRPL44/RPS7	10
CC	GO:0005747	mitochondrial respiratory chain complex I	6/94	49/19869	1.13233131882939e-07	1.13233131882939e-07	2.13463416085541e-06	NDUFV2/NDUFA11/NDUFB5/NDUFS8/NDUFAB1/NDUFA5	6
CC	GO:0030964	NADH dehydrogenase complex	6/94	49/19869	1.13233131882939e-07	1.13233131882939e-07	2.13463416085541e-06	NDUFV2/NDUFA11/NDUFB5/NDUFS8/NDUFAB1/NDUFA5	6
CC	GO:0045271	respiratory chain complex I	6/94	49/19869	1.13233131882939e-07	1.13233131882939e-07	2.13463416085541e-06	NDUFV2/NDUFA11/NDUFB5/NDUFS8/NDUFAB1/NDUFA5	6
CC	GO:0005759	mitochondrial matrix	13/94	483/19869	4.42072682281101e-07	4.42072682281101e-07	7.63932617626113e-06	MRPS23/SMDT1/MRPS12/QARS1/UQCC2/PARK7/CHCHD1/MRPL43/MRPL44/VDAC1/NDUFS8/NDUFAB1/HADHB	13
CC	GO:0015935	small ribosomal subunit	6/94	77/19869	1.72623647867193e-06	1.72623647867193e-06	2.75359179188964e-05	MRPS23/MRPS12/RPS20/RPS23/CHCHD1/RPS7	6
CC	GO:1990204	oxidoreductase complex	7/94	125/19869	2.14231429793357e-06	2.14231429793357e-06	3.17320238114973e-05	NDUFV2/NDUFA11/NDUFB5/NDUFS8/NDUFAB1/UQCRFS1/NDUFA5	7
CC	GO:0000313	organellar ribosome	5/94	89/19869	6.45749447105474e-05	6.45749447105474e-05	0.0008369252702617	MRPS23/MRPS12/CHCHD1/MRPL43/MRPL44	5
CC	GO:0005761	mitochondrial ribosome	5/94	89/19869	6.45749447105474e-05	6.45749447105474e-05	0.0008369252702617	MRPS23/MRPS12/CHCHD1/MRPL43/MRPL44	5
CC	GO:1990351	transporter complex	9/94	405/19869	0.000128274835474567	0.000128274835474567	0.00156471471136159	SMDT1/NDUFV2/TIMM10/NDUFA11/NDUFB5/NDUFS8/NDUFAB1/UQCRFS1/NDUFA5	9
CC	GO:0022626	cytosolic ribosome	5/94	105/19869	0.000141548930281693	0.000141548930281693	0.00163070989856688	RPL17/RPL30/RPS20/RPS23/RPS7	5
CC	GO:1904813	ficolin-1-rich granule lumen	5/94	124/19869	0.000307571529138399	0.000307571529138399	0.00319678717518996	PSMB1/PDAP1/ILF2/IMPDH2/ALDOA	5
CC	GO:0045277	respiratory chain complex IV	3/94	28/19869	0.000308319575272128	0.000308319575272128	0.00319678717518996	COA6/COX5A/UQCRFS1	3
CC	GO:0005681	spliceosomal complex	6/94	195/19869	0.000329136816331162	0.000329136816331162	0.00325012294823253	SNW1/LSM5/SNRPE/HNRNPM/RHEB/SRRM1	6
CC	GO:1902495	transmembrane transporter complex	8/94	379/19869	0.000434654748856463	0.000434654748856463	0.00397852795473116	SMDT1/NDUFV2/NDUFA11/NDUFB5/NDUFS8/NDUFAB1/UQCRFS1/NDUFA5	8
CC	GO:0000314	organellar small ribosomal subunit	3/94	32/19869	0.000460459072933353	0.000460459072933353	0.00397852795473116	MRPS23/MRPS12/CHCHD1	3
CC	GO:0005763	mitochondrial small ribosomal subunit	3/94	32/19869	0.000460459072933353	0.000460459072933353	0.00397852795473116	MRPS23/MRPS12/CHCHD1	3
CC	GO:0005758	mitochondrial intermembrane space	4/94	84/19869	0.000678771097810615	0.000678771097810615	0.00563022763236595	COA6/TIMM10/UQCC2/PARK7	4
CC	GO:0032040	small-subunit processome	3/94	39/19869	0.000828343746556989	0.000828343746556989	0.00660662826201323	IMP4/IMP3/RPS7	3
CC	GO:0071013	catalytic step 2 spliceosome	4/94	90/19869	0.000879691497372788	0.000879691497372788	0.00675630506754149	SNW1/SNRPE/HNRNPM/SRRM1	4
CC	GO:0070069	cytochrome complex	3/94	42/19869	0.00102991690830229	0.00102991690830229	0.0074000906663365	COA6/COX5A/UQCRFS1	3
CC	GO:0031970	organelle envelope lumen	4/94	94/19869	0.00103488577592675	0.00103488577592675	0.0074000906663365	COA6/TIMM10/UQCC2/PARK7	4
CC	GO:0000221	vacuolar proton-transporting V-type ATPase, V1 domain	2/94	11/19869	0.00118460850231462	0.00118460850231462	0.00746566191308964	ATP6V1E1/ATP6V1B2	2
CC	GO:0019774	proteasome core complex, beta-subunit complex	2/94	11/19869	0.00118460850231462	0.00118460850231462	0.00746566191308964	PSMB1/PSMB9	2
CC	GO:0033180	proton-transporting V-type ATPase, V1 domain	2/94	11/19869	0.00118460850231462	0.00118460850231462	0.00746566191308964	ATP6V1E1/ATP6V1B2	2
CC	GO:0009295	nucleoid	3/94	45/19869	0.00126006730259	0.00126006730259	0.00746566191308964	UQCC2/VDAC1/HADHB	3
CC	GO:0022627	cytosolic small ribosomal subunit	3/94	45/19869	0.00126006730259	0.00126006730259	0.00746566191308964	RPS20/RPS23/RPS7	3
CC	GO:0042645	mitochondrial nucleoid	3/94	45/19869	0.00126006730259	0.00126006730259	0.00746566191308964	UQCC2/VDAC1/HADHB	3
CC	GO:1990124	messenger ribonucleoprotein complex	2/94	13/19869	0.00166966778387171	0.00166966778387171	0.00961767700066451	HNRNPAB/PKP3	2
CC	GO:0101002	ficolin-1-rich granule	5/94	185/19869	0.00186400705337482	0.00186400705337482	0.0104469243105218	PSMB1/PDAP1/ILF2/IMPDH2/ALDOA	5
CC	GO:0015934	large ribosomal subunit	4/94	115/19869	0.00217582677398917	0.00217582677398917	0.0118736253317414	RPL17/RPL30/MRPL43/MRPL44	4
CC	GO:1905368	peptidase complex	4/94	118/19869	0.00238935497562404	0.00238935497562404	0.0127045325289591	PSMB1/ENY2/PSMB9/PSMC5	4
CC	GO:0000502	proteasome complex	3/94	59/19869	0.00275225523875364	0.00275225523875364	0.0142682705798544	PSMB1/PSMB9/PSMC5	3
CC	GO:0033178	proton-transporting two-sector ATPase complex, catalytic domain	2/94	19/19869	0.00359346063277347	0.00359346063277347	0.0181748843300738	ATP6V1E1/ATP6V1B2	2
CC	GO:0016607	nuclear speck	7/94	419/19869	0.0037434352690807	0.0037434352690807	0.0184826252633809	SNW1/IFI16/ARL6IP4/APEX1/PIN1/PPP4R3B/SRRM1	7
CC	GO:0005839	proteasome core complex	2/94	20/19869	0.00398048140904254	0.00398048140904254	0.0191959568563374	PSMB1/PSMB9	2
CC	GO:0034774	secretory granule lumen	6/94	322/19869	0.0042680575239956	0.0042680575239956	0.0201150079480175	PSMB1/PYCARD/ILF2/PA2G4/IMPDH2/ALDOA	6
CC	GO:0060205	cytoplasmic vesicle lumen	6/94	325/19869	0.00446377362511724	0.00446377362511724	0.0205699041905988	PSMB1/PYCARD/ILF2/PA2G4/IMPDH2/ALDOA	6
CC	GO:0031983	vesicle lumen	6/94	327/19869	0.00459788803337191	0.00459788803337191	0.0207273213403722	PSMB1/PYCARD/ILF2/PA2G4/IMPDH2/ALDOA	6
CC	GO:0030684	preribosome	3/94	76/19869	0.00561762185770688	0.00561762185770688	0.0247854760575197	IMP4/IMP3/RPS7	3
CC	GO:0005751	mitochondrial respiratory chain complex IV	2/94	25/19869	0.00618922832021319	0.00618922832021319	0.0261928674346294	COX5A/UQCRFS1	2
CC	GO:0016471	vacuolar proton-transporting V-type ATPase complex	2/94	25/19869	0.00618922832021319	0.00618922832021319	0.0261928674346294	ATP6V1E1/ATP6V1B2	2
CC	GO:1905369	endopeptidase complex	3/94	82/19869	0.00693427994784833	0.00693427994784833	0.0287590136784446	PSMB1/PSMB9/PSMC5	3
CC	GO:0033176	proton-transporting V-type ATPase complex	2/94	27/19869	0.00719712449870474	0.00719712449870474	0.0292638498708944	ATP6V1E1/ATP6V1B2	2
CC	GO:0030686	90S preribosome	2/94	29/19869	0.00827401875034686	0.00827401875034686	0.0329425622149804	IMP4/IMP3	2
CC	GO:0016591	RNA polymerase II, holoenzyme	3/94	88/19869	0.00841958379453941	0.00841958379453941	0.0329425622149804	POLR2K/ENY2/GTF2H5	3
CC	GO:0071007	U2-type catalytic step 2 spliceosome	2/94	30/19869	0.00883791313712903	0.00883791313712903	0.0339389646786436	SNW1/SNRPE	2
CC	GO:0042788	polysomal ribosome	2/94	31/19869	0.00941854702209894	0.00941854702209894	0.0351998886782914	RPL30/RPS23	2
CC	GO:0005684	U2-type spliceosomal complex	3/94	92/19869	0.0095057567395183	0.0095057567395183	0.0351998886782914	SNW1/LSM5/SNRPE	3
CC	GO:0055029	nuclear DNA-directed RNA polymerase complex	3/94	112/19869	0.016126785508705	0.016126785508705	0.0586699306595548	POLR2K/ENY2/GTF2H5	3
CC	GO:0000428	DNA-directed RNA polymerase complex	3/94	115/19869	0.0172946229219907	0.0172946229219907	0.0618337697936873	POLR2K/ENY2/GTF2H5	3
CC	GO:0030880	RNA polymerase complex	3/94	119/19869	0.0189235990236798	0.0189235990236798	0.0664041222032062	POLR2K/ENY2/GTF2H5	3
CC	GO:0046540	U4/U6 x U5 tri-snRNP complex	2/94	45/19869	0.0192133754598109	0.0192133754598109	0.0664041222032062	LSM5/SNRPE	2
CC	GO:0097526	spliceosomal tri-snRNP complex	2/94	46/19869	0.0200256477206112	0.0200256477206112	0.0680768352193339	LSM5/SNRPE	2
CC	GO:0016363	nuclear matrix	3/94	126/19869	0.0219726135035411	0.0219726135035411	0.0734907446553073	SNW1/HNRNPM/SRRM1	3
CC	GO:0016469	proton-transporting two-sector ATPase complex	2/94	50/19869	0.0234152164497678	0.0234152164497678	0.0758683822467805	ATP6V1E1/ATP6V1B2	2
CC	GO:0071005	U2-type precatalytic spliceosome	2/94	50/19869	0.0234152164497678	0.0234152164497678	0.0758683822467805	LSM5/SNRPE	2
CC	GO:0031968	organelle outer membrane	4/94	235/19869	0.0254449191509208	0.0254449191509208	0.0809141921146095	NUTF2/TOMM20/VDAC1/HADHB	4
CC	GO:0071011	precatalytic spliceosome	2/94	53/19869	0.0261007710331962	0.0261007710331962	0.0809141921146095	LSM5/SNRPE	2
CC	GO:0019867	outer membrane	4/94	237/19869	0.0261430879598725	0.0261430879598725	0.0809141921146095	NUTF2/TOMM20/VDAC1/HADHB	4
CC	GO:1904724	tertiary granule lumen	2/94	55/19869	0.0279572452854041	0.0279572452854041	0.085256614879638	ILF2/ALDOA	2
CC	GO:0000315	organellar large ribosomal subunit	2/94	56/19869	0.0289048874055614	0.0289048874055614	0.0856280123142196	MRPL43/MRPL44	2
CC	GO:0005762	mitochondrial large ribosomal subunit	2/94	56/19869	0.0289048874055614	0.0289048874055614	0.0856280123142196	MRPL43/MRPL44	2
CC	GO:0034399	nuclear periphery	3/94	145/19869	0.03152210125104	0.03152210125104	0.0916561389032989	SNW1/HNRNPM/SRRM1	3
CC	GO:0022625	cytosolic large ribosomal subunit	2/94	59/19869	0.0318237558425667	0.0318237558425667	0.0916561389032989	RPL17/RPL30	2
CC	GO:0005844	polysome	2/94	66/19869	0.0390599174679483	0.0390599174679483	0.110956074133898	RPL30/RPS23	2
CC	GO:0005765	lysosomal membrane	5/94	418/19869	0.0483374217853733	0.0483374217853733	0.127491485763189	GNAI1/ATP6V1E1/RHEB/ARL8B/ATP6V1B2	5
CC	GO:0098852	lytic vacuole membrane	5/94	418/19869	0.0483374217853733	0.0483374217853733	0.127491485763189	GNAI1/ATP6V1E1/RHEB/ARL8B/ATP6V1B2	5
MF	GO:0015399	primary active transmembrane transporter activity	9/97	169/18432	2.64966672333197e-07	2.64966672333197e-07	4.46476974585518e-05	ATP6V1E1/NDUFV2/ATP6V1B2/NDUFB5/TOMM20/NDUFS8/COX5A/UQCRFS1/NDUFA5	9
MF	GO:0003735	structural constituent of ribosome	9/97	176/18432	3.73703194586998e-07	3.73703194586998e-07	4.46476974585518e-05	MRPS23/MRPS12/RPL17/RPL30/RPS20/RPS23/MRPL43/MRPL44/RPS7	9
MF	GO:0015453	oxidoreduction-driven active transmembrane transporter activity	6/97	71/18432	1.974684760419e-06	1.974684760419e-06	0.000157281908987759	NDUFV2/NDUFB5/NDUFS8/COX5A/UQCRFS1/NDUFA5	6
MF	GO:0009055	electron transfer activity	6/97	122/18432	4.49293563181979e-05	4.49293563181979e-05	0.00241615535822508	NDUFV2/NDUFB5/NDUFS8/COX5A/UQCRFS1/NDUFA5	6
MF	GO:0008137	NADH dehydrogenase (ubiquinone) activity	4/97	41/18432	6.28590070353695e-05	6.28590070353695e-05	0.00241615535822508	NDUFV2/NDUFB5/NDUFS8/NDUFA5	4
MF	GO:0050136	NADH dehydrogenase (quinone) activity	4/97	42/18432	6.91965661289219e-05	6.91965661289219e-05	0.00241615535822508	NDUFV2/NDUFB5/NDUFS8/NDUFA5	4
MF	GO:0140104	molecular carrier activity	5/97	83/18432	7.63563658023954e-05	7.63563658023954e-05	0.00241615535822508	KPNA4/TIMM10/PARK7/NAP1L1/NDUFAB1	5
MF	GO:0003954	NADH dehydrogenase activity	4/97	44/18432	8.32500365476784e-05	8.32500365476784e-05	0.00241615535822508	NDUFV2/NDUFB5/NDUFS8/NDUFA5	4
MF	GO:0003955	NAD(P)H dehydrogenase (quinone) activity	4/97	45/18432	9.10049705410768e-05	9.10049705410768e-05	0.00241615535822508	NDUFV2/NDUFB5/NDUFS8/NDUFA5	4
MF	GO:0016655	oxidoreductase activity, acting on NAD(P)H, quinone or similar compound as acceptor	4/97	57/18432	0.000229902603124819	0.000229902603124819	0.00549346220098251	NDUFV2/NDUFB5/NDUFS8/NDUFA5	4
MF	GO:0022804	active transmembrane transporter activity	9/97	417/18432	0.000351390812517238	0.000351390812517238	0.00763308272166633	ATP6V1E1/NDUFV2/ATP6V1B2/NDUFB5/TOMM20/NDUFS8/COX5A/UQCRFS1/NDUFA5	9
MF	GO:0016651	oxidoreductase activity, acting on NAD(P)H	4/97	87/18432	0.00114867084072022	0.00114867084072022	0.0228726562143412	NDUFV2/NDUFB5/NDUFS8/NDUFA5	4
MF	GO:0019107	myristoyltransferase activity	2/97	11/18432	0.00146167382959736	0.00146167382959736	0.0268663934670931	SCP2/HADHB	2
MF	GO:0016408	C-acyltransferase activity	2/97	20/18432	0.00489615636866261	0.00489615636866261	0.0728871924063759	SCP2/HADHB	2
MF	GO:0051536	iron-sulfur cluster binding	3/97	69/18432	0.00575865206785448	0.00575865206785448	0.0728871924063759	NDUFV2/NDUFS8/UQCRFS1	3
MF	GO:0051540	metal cluster binding	3/97	69/18432	0.00575865206785448	0.00575865206785448	0.0728871924063759	NDUFV2/NDUFS8/UQCRFS1	3
MF	GO:0015078	proton transmembrane transporter activity	4/97	136/18432	0.00578700233494498	0.00578700233494498	0.0728871924063759	ATP6V1E1/ATP6V1B2/COX5A/UQCRFS1	4
MF	GO:0055106	ubiquitin-protein transferase regulator activity	2/97	22/18432	0.00591215062876928	0.00591215062876928	0.0728871924063759	RPS20/RPS7	2
MF	GO:0019003	GDP binding	3/97	73/18432	0.0067335371515324	0.0067335371515324	0.0728871924063759	GNAI1/RHEB/ARL8B	3
MF	GO:0042625	ATPase-coupled ion transmembrane transporter activity	2/97	24/18432	0.00701579363030534	0.00701579363030534	0.0728871924063759	ATP6V1E1/ATP6V1B2	2
MF	GO:0044769	ATPase activity, coupled to transmembrane movement of ions, rotational mechanism	2/97	24/18432	0.00701579363030534	0.00701579363030534	0.0728871924063759	ATP6V1E1/ATP6V1B2	2
MF	GO:0046961	proton-transporting ATPase activity, rotational mechanism	2/97	24/18432	0.00701579363030534	0.00701579363030534	0.0728871924063759	ATP6V1E1/ATP6V1B2	2
MF	GO:0051537	2 iron, 2 sulfur cluster binding	2/97	24/18432	0.00701579363030534	0.00701579363030534	0.0728871924063759	NDUFV2/UQCRFS1	2
MF	GO:0140597	protein carrier chaperone	2/97	26/18432	0.008205171888701	0.008205171888701	0.0811632704011412	TIMM10/NAP1L1	2
MF	GO:0009678	pyrophosphate hydrolysis-driven proton transmembrane transporter activity	2/97	27/18432	0.00883142193351625	0.00883142193351625	0.0811632704011412	ATP6V1E1/ATP6V1B2	2
MF	GO:0050681	nuclear androgen receptor binding	2/97	27/18432	0.00883142193351625	0.00883142193351625	0.0811632704011412	SNW1/PARK7	2
MF	GO:0030515	snoRNA binding	2/97	32/18432	0.0122690278679001	0.0122690278679001	0.108579700819233	IMP4/IMP3	2
MF	GO:0042626	ATPase-coupled transmembrane transporter activity	3/97	98/18432	0.0149881908467552	0.0149881908467552	0.127906741436595	ATP6V1E1/ATP6V1B2/TOMM20	3
MF	GO:0044390	ubiquitin-like protein conjugating enzyme binding	2/97	37/18432	0.01619655627615	0.01619655627615	0.130872812738429	DCUN1D5/PARK7	2
MF	GO:0003713	transcription coactivator activity	5/97	281/18432	0.016431168119142	0.016431168119142	0.130872812738429	SNW1/ENY2/NUCKS1/APEX1/PARK7	5
MF	GO:0005504	fatty acid binding	2/97	49/18432	0.0274603088266558	0.0274603088266558	0.211663500972865	NDUFAB1/SCP2	2
MF	GO:0005048	signal sequence binding	2/97	50/18432	0.0285080343412043	0.0285080343412043	0.212872493271493	KPNA4/TOMM20	2
MF	GO:0015485	cholesterol binding	2/97	51/18432	0.0295716167545983	0.0295716167545983	0.214123030408096	VDAC1/SCP2	2
MF	GO:0019829	ATPase-coupled cation transmembrane transporter activity	2/97	53/18432	0.0317455850684383	0.0317455850684383	0.223104	ATP6V1E1/ATP6V1B2	2
MF	GO:0140297	DNA-binding transcription factor binding	6/97	476/18432	0.0397420926014486	0.0397420926014486	0.249172954352601	SNW1/PSMC5/ID3/NUCKS1/APEX1/PARK7	6
MF	GO:0005507	copper ion binding	2/97	61/18432	0.0410380459431821	0.0410380459431821	0.249172954352601	COA6/PARK7	2
MF	GO:0032934	sterol binding	2/97	61/18432	0.0410380459431821	0.0410380459431821	0.249172954352601	VDAC1/SCP2	2
MF	GO:0016836	hydro-lyase activity	2/97	65/18432	0.0460218878923874	0.0460218878923874	0.249172954352601	PARK7/HADHB	2
MF	GO:0019843	rRNA binding	2/97	67/18432	0.0485932899164923	0.0485932899164923	0.249172954352601	IMP4/IMP3	2
MF	GO:0005525	GTP binding	5/97	379/18432	0.0498217179349803	0.0498217179349803	0.249172954352601	GNAI1/IFI44L/RHEB/ARL8B/HBS1L	5

## Sheet: KEGG_enrich
ID	Description	GeneRatio	BgRatio	pvalue	p.adjust	qvalue	geneID	Count
hsa05012	Parkinson disease	13/61	271/9434	1.3033834653741e-08	1.3033834653741e-08	9.18812183735695e-07	PSMB1/GNAI1/PSMC5/NDUFV2/PARK7/NDUFA11/NDUFB5/VDAC1/NDUFS8/NDUFAB1/COX5A/UQCRFS1/NDUFA5	13
hsa00190	Oxidative phosphorylation	10/61	138/9434	1.54490544167949e-08	1.54490544167949e-08	9.18812183735695e-07	ATP6V1E1/NDUFV2/NDUFA11/ATP6V1B2/NDUFB5/NDUFS8/NDUFAB1/COX5A/UQCRFS1/NDUFA5	10
hsa05016	Huntington disease	12/61	311/9434	5.4489630481735e-07	5.4489630481735e-07	2.16046605067932e-05	PSMB1/POLR2K/PSMC5/NDUFV2/NDUFA11/NDUFB5/VDAC1/NDUFS8/NDUFAB1/COX5A/UQCRFS1/NDUFA5	12
hsa05020	Prion disease	11/61	278/9434	1.34768808616411e-06	1.34768808616411e-06	4.00759878254065e-05	PSMB1/PSMC5/NDUFV2/NDUFA11/NDUFB5/VDAC1/NDUFS8/NDUFAB1/COX5A/UQCRFS1/NDUFA5	11
hsa04714	Thermogenesis	10/61	235/9434	2.24784009955962e-06	2.24784009955962e-06	5.34749328947868e-05	COA6/RHEB/NDUFV2/NDUFA11/NDUFB5/NDUFS8/NDUFAB1/COX5A/UQCRFS1/NDUFA5	10
hsa05415	Diabetic cardiomyopathy	9/61	205/9434	5.90786387736959e-06	5.90786387736959e-06	0.000116569221765738	NDUFV2/NDUFA11/NDUFB5/VDAC1/NDUFS8/NDUFAB1/COX5A/UQCRFS1/NDUFA5	9
hsa04932	Non-alcoholic fatty liver disease	8/61	157/9434	6.86004712161203e-06	6.86004712161203e-06	0.000116569221765738	NDUFV2/NDUFA11/NDUFB5/NDUFS8/NDUFAB1/COX5A/UQCRFS1/NDUFA5	8
hsa05208	Chemical carcinogenesis - reactive oxygen species	9/61	227/9434	1.34743495164352e-05	1.34743495164352e-05	0.000200342302020681	NDUFV2/NDUFA11/NDUFB5/VDAC1/NDUFS8/NDUFAB1/COX5A/UQCRFS1/NDUFA5	9
hsa05014	Amyotrophic lateral sclerosis	11/61	371/9434	2.13608048486708e-05	2.13608048486708e-05	0.000282312391567229	PSMB1/PSMC5/NDUFV2/NDUFA11/NDUFB5/VDAC1/NDUFS8/NDUFAB1/COX5A/UQCRFS1/NDUFA5	11
hsa05010	Alzheimer disease	11/61	391/9434	3.47161514276587e-05	3.47161514276587e-05	0.000412939485402677	PSMB1/PSMC5/NDUFV2/NDUFA11/NDUFB5/VDAC1/NDUFS8/NDUFAB1/COX5A/UQCRFS1/NDUFA5	11
hsa04723	Retrograde endocannabinoid signaling	7/61	149/9434	4.54929960585961e-05	4.54929960585961e-05	0.000491581260230786	GNAI1/NDUFV2/NDUFA11/NDUFB5/NDUFS8/NDUFAB1/NDUFA5	7
hsa05022	Pathways of neurodegeneration - multiple diseases	12/61	483/9434	4.95931536869996e-05	4.95931536869996e-05	0.000491581260230786	PSMB1/PSMC5/NDUFV2/PARK7/NDUFA11/NDUFB5/VDAC1/NDUFS8/NDUFAB1/COX5A/UQCRFS1/NDUFA5	12
hsa03050	Proteasome	3/61	46/9434	0.00320433919207585	0.00320433919207585	0.0293190549558357	PSMB1/PSMB9/PSMC5	3
hsa04966	Collecting duct acid secretion	2/61	28/9434	0.0139542233408741	0.0139542233408741	0.118558438911186	ATP6V1E1/ATP6V1B2	2
hsa04623	Cytosolic DNA-sensing pathway	3/61	83/9434	0.0163864217745375	0.0163864217745375	0.129941449861244	POLR2K/IFI16/PYCARD	3
hsa05171	Coronavirus disease - COVID-19	5/61	238/9434	0.0185277380530208	0.0185277380530208	0.137739105262589	RPL17/RPL30/RPS20/RPS23/RPS7	5
hsa03015	mRNA surveillance pathway	3/61	103/9434	0.0288129917788716	0.0288129917788716	0.201601738143188	PAPOLA/SRRM1/HBS1L	3
hsa03013	Nucleocytoplasmic transport	3/61	108/9434	0.0325204879102956	0.0325204879102956	0.21033967586355	SUMO3/KPNA4/SRRM1	3
hsa04621	NOD-like receptor signaling pathway	4/61	189/9434	0.0335985057463458	0.0335985057463458	0.21033967586355	IFI16/RBCK1/PYCARD/VDAC1	4
hsa05110	Vibrio cholerae infection	2/61	51/9434	0.0428239607332829	0.0428239607332829	0.254689871729525	ATP6V1E1/ATP6V1B2	2
