# Supplementary material
Source: Research Square preprint supplement (doi:10.21203/rs.3.rs-8968229/v1)
Supplement: Supplementary file 5 [file d5328fdde8fbfd7ff388a68d.xlsx]

## Sheet: TCGA-OSCC_uniCox_Sig
id	z	HR	HR.95L	HR.95H	pvalue
ALDOA	3.21469310947713	1.44190884571696	1.15354655548201	1.80235562186571	0.00130584048204391
APEX1	2.39776866541234	1.38148850784317	1.06078111875302	1.7991557952561	0.0164952792221252
ATP6V1E1	2.34825515167584	1.51509234717648	1.07111513866196	2.14309810179722	0.0188615956346471
BTF3L4	2.21902472735669	1.4991737606819	1.04840695675853	2.14374957188954	0.0264850423196289
C7orf50	2.06375466267331	1.27402957736853	1.01225447338663	1.60350130000352	0.0390409836655022
CHCHD1	2.17726101651324	1.38942514549862	1.03336885271316	1.86816375379929	0.0294610980461337
COA6	2.03693771061418	1.23637917486239	1.00805055895116	1.51642539201991	0.0416562844927871
COX5A	2.47947880563042	1.47512414844647	1.0848606193857	2.00577955771135	0.0131574549384721
EIF3J	2.6062978472731	1.59209799637204	1.12224153774526	2.25867243797139	0.00915268334213503
ENY2	2.09971471824658	1.32069962784409	1.01868604487999	1.71225228396351	0.0357539440787935
EWSR1	2.2795031065351	1.53094823691903	1.06151865824611	2.20797108549935	0.0226371755147533
HADHB	3.39327106225843	1.76715759585563	1.27188634631913	2.45528696618833	0.000690632607899341
HNRNPA0	2.35043306189337	1.4675172024351	1.06579548013568	2.02065666404289	0.0187515800807654
HNRNPAB	2.21137469517704	1.40331765274431	1.03927416751683	1.89488057728704	0.0270099006753339
ILF2	2.33018876822053	1.40023222795316	1.05494190161769	1.85853864482218	0.0197961763508648
IMP3	2.47442336673028	1.52325688544326	1.09144163022281	2.12591445552304	0.0133451447622659
IMP4	2.47739220764512	1.47753791821123	1.0849503025045	2.01218276515751	0.0132346378871435
KPNA4	2.06726917285179	1.33882196295757	1.01526115043203	1.76550067707685	0.0387087973409769
LSM5	2.53747242685055	1.40647528285032	1.0807212299294	1.8304190446949	0.0111656163425299
MAP3K13	2.12700621385988	1.25259908924778	1.01784482116987	1.54149674464228	0.0334195668999583
MRPL44	2.61508305625869	1.54703805249854	1.1155086791688	2.14550256808562	0.00892057602900908
MRPS23	2.92948781124785	1.54788988198662	1.15556694503787	2.07340915820158	0.0033952112851542
NAP1L1	2.06685741688753	1.35551036953916	1.01585582624472	1.80872946185727	0.0387475912865332
NDUFA5	2.33627592151091	1.48926234297969	1.06625495624618	2.08008629945846	0.0194768656118326
NDUFAB1	2.47059682551662	1.43952034162021	1.07820437441475	1.92191653373988	0.0134887797502783
NDUFB5	3.37934425629249	1.52429136287003	1.19369004456693	1.94645517024741	0.00072658962306387
NUCKS1	2.20133521835541	1.32990122290669	1.03175481576693	1.7142030603211	0.0277123014015654
PA2G4	2.14883395087025	1.45275686399867	1.03336991298909	2.04234948140738	0.0316475650573808
PAPOLA	2.4870068197088	1.47571248971589	1.08596193691347	2.00534409013729	0.0128822929522798
PCNP	2.12423476737544	1.34546774794053	1.02321287602143	1.76921489474127	0.0336505173528106
POLR2K	1.9840670249152	1.30433220244217	1.00323291073107	1.69580012390932	0.0472483685601399
PSMG2	2.67959292903514	1.59250747611676	1.13310670970105	2.23816524937609	0.00737117397076262
RHEB	2.50813598304683	1.41357717979912	1.07858273396973	1.85261675374171	0.0121369949527287
RPL17	2.33931109674567	1.36178656742367	1.05135013926077	1.76388682130147	0.0193193388192439
RPL30	2.25807253134455	1.33678030236727	1.03906406147566	1.71979923380209	0.0239411378453407
RPS7	2.3126365650447	1.40571413372765	1.05330466281362	1.87603102456914	0.0207426293946008
SKA2	3.13456428868457	1.49884095221161	1.16375092187543	1.93041668779624	0.00172109536665077
SNRPE	2.12178522614791	1.28838384333556	1.01951301244661	1.62816257125021	0.0338557778381952
SNW1	2.25996412677263	1.40538542775182	1.04621076704776	1.88786835573352	0.0238234773584686
SSB	2.95288668553789	1.43547697363403	1.12925170827693	1.82474299284228	0.00314817502075295
SUMO3	2.64979283601491	1.50354978545756	1.11201240975021	2.03294669873088	0.00805411401622085
TIPRL	2.52024189412747	1.52579818756435	1.09848328463373	2.11934049588285	0.0117274210892933
TOMM20	3.18682834250676	1.57359139422761	1.19069195916524	2.07962257318272	0.00143842117066576
UQCRFS1	2.94271682000691	1.50649083824015	1.14665793215488	1.97924296519404	0.00325345870528531
VDAC1	3.54110438452254	1.83601648389697	1.31167	2.5699784512882	0.00039845590578837
