# Supplementary material
Source: Research Square preprint supplement (doi:10.21203/rs.3.rs-8968229/v1)
Supplement: Supplementary file 6 [file e0179362847c75d99520282e.xlsx]

## Sheet: 06PH.Sig
id	p
ALDOA	0.214026822339384
APEX1	0.465087028043644
ATP6V1E1	0.995552489844232
BTF3L4	0.553969303916401
C7orf50	0.585143038734643
CHCHD1	0.765299895518139
COA6	0.182176662131351
COX5A	0.214752944984104
EIF3J	0.983910384389421
ENY2	0.389187429648631
EWSR1	0.334213931768688
HADHB	0.310443750951739
HNRNPA0	0.539927582230804
HNRNPAB	0.947490688430044
ILF2	0.223162748152507
IMP3	0.828998072885549
IMP4	0.590706042280719
KPNA4	0.900725920167103
MAP3K13	0.344309868197615
MRPL44	0.935123733716365
MRPS23	0.466860132106662
NAP1L1	0.922810741389007
NDUFA5	0.539399709288921
NDUFAB1	0.112745206480153
NDUFB5	0.107947811630051
NUCKS1	0.230299034734243
PA2G4	0.589472052405886
PAPOLA	0.55444617200774
PCNP	0.986344820347672
POLR2K	0.874984130305685
PSMG2	0.366102977856322
RHEB	0.960958621807761
RPL17	0.618653769328184
RPL30	0.707740174941401
RPS7	0.394247111744065
SKA2	0.808247831498047
SNRPE	0.244532670287414
SNW1	0.888410537799784
SSB	0.769980814733336
SUMO3	0.717237413200327
TIPRL	0.804457882139232
TOMM20	0.0631005960134797
VDAC1	0.774145621651769
